1 ***Plasmodium* ARK2-EB1 axis drives the unconventional spindle dynamics,**  
2 **scaffold formation and chromosome segregation of sexual transmission**  
3 **stages**

4

5

6 Mohammad Zeeshan<sup>1</sup>, Edward Rea<sup>1</sup>, Steven Abel<sup>2</sup>, Kruno Vukušić<sup>3</sup>, Robert  
7 Markus<sup>1</sup>, Declan Brady<sup>1</sup>, Antonius Eze<sup>1#</sup>, Ravish Raspa<sup>4</sup>, Aurelia Balestra<sup>4</sup>, Andrew  
8 R. Bottrill<sup>5</sup>, Mathieu Brochet<sup>4</sup>, David S. Guttery<sup>6</sup>, Iva M. Tolić<sup>3</sup>, Anthony A. Holder<sup>7</sup>,  
9 Karine G. Le Roch<sup>2</sup>, Eelco C. Tromer<sup>8</sup>, Rita Tewari<sup>1\*</sup>

10

11 <sup>1</sup>School of Life Sciences, University of Nottingham, Nottingham, UK.

12 <sup>2</sup>Department of Molecular, Cell and Systems Biology, University of California  
13 Riverside, 900 University Ave., Riverside, USA.

14 <sup>3</sup>Division of Molecular Biology, Ruđer Bošković Institute, 10000 Zagreb, Croatia.

15 <sup>4</sup>Faculty of Medicine, University of Geneva, Geneva, Switzerland.

16 <sup>5</sup>School of Life Sciences, Gibbet Hill Campus, University of Warwick, Coventry, UK

17 <sup>6</sup>Department of Genetics and Genome Biology, College of Life Sciences, University  
18 of Leicester, Leicester, UK.

19 <sup>7</sup>Malaria Parasitology Laboratory, The Francis Crick Institute, London, UK.

20 <sup>8</sup>Faculty of Science and Engineering, University of Groningen, Groningen  
21 Biomolecular Sciences and Biotechnology Institute, Cell Biochemistry, Groningen,  
22 The Netherlands.

23 <sup>#</sup>Current address: Department of Medical Biochemistry, Faculty of Basic Medical  
24 Sciences, College of Medicine, University of Nigeria, Enugu Campus, Enugu,  
25 Nigeria.

26

27

28 \*For correspondence

29 Rita Tewari: [rita.tewari@nottingham.ac.uk](mailto:rita.tewari@nottingham.ac.uk)

30

31 **Abstract**

32

33 Mechanisms of cell division are remarkably diverse, suggesting the underlying  
34 molecular networks among eukaryotes differ extensively. The Aurora family of  
35 kinases orchestrates the process of chromosome segregation and cytokinesis during  
36 cell division through precise spatiotemporal regulation of their catalytic activities by  
37 distinct scaffolds. *Plasmodium* spp., the causative agents of malaria, are unicellular  
38 eukaryotes that have three divergent aurora-related kinases (ARKs) and lack most  
39 canonical scaffolds/activators. The parasite uses unconventional modes of  
40 chromosome segregation during endomitosis and meiosis in sexual transmission  
41 stages within mosquito host. This includes a rapid threefold genome replication from  
42 1N to 8N with successive cycles of closed mitosis, spindle formation and  
43 chromosome segregation within eight minutes (termed male gametogony). Kinome  
44 studies had previously suggested likely essential functions for all three *Plasmodium*  
45 ARKs during asexual mitotic cycles; however, little is known about their location,  
46 function, or their scaffolding molecules during unconventional sexual proliferative  
47 stages. Using a combination of super-resolution microscopy, mass spectrometry,  
48 and live-cell fluorescence imaging, we set out to investigate the role of the atypical  
49 Aurora paralog ARK2 to proliferative sexual stages using rodent malaria model  
50 *Plasmodium berghei*. We find that ARK2 primarily localises to the spindle apparatus  
51 in the vicinity of kinetochores during both mitosis and meiosis. Interactomics and co-  
52 localisation studies reveal a unique ARK2 scaffold at the spindle including the  
53 microtubule plus end-binding protein EB1, lacking conserved Aurora scaffold  
54 proteins. Gene function studies indicate complementary functions of ARK2 and EB1  
55 in driving endomitotic divisions and thereby parasite transmission. Our discovery of a  
56 novel Aurora kinase spindle scaffold underlines the emerging flexibility of molecular  
57 networks to rewire and drive unconventional mechanisms of chromosome  
58 segregation in the malaria parasite *Plasmodium*.

59

## 60 Introduction

61

62 Cell division proceeds through either mitosis or meiosis, after DNA replication to  
63 enable eukaryotes to propagate, proliferate and evolve in diverse ecological niches  
64 (Drechsler and McAinsh, 2012). Cell division and chromosome segregation diverge  
65 in different eukaryotes, but both the mechanistic basis and the molecular explanation  
66 of these differences are largely unknown.

67 Aurora kinases (AKs) are a conserved family of spindle-associated protein kinases,  
68 with critical roles in four aspects of cell division: (I) driving mitotic/meiotic spindle  
69 assembly and disassembly, (II) regulating spindle pole structure and dynamics, (III)  
70 promoting accurate chromosome segregation, and (IV) orchestrating cellular fission  
71 at cytokinesis (Carmena et al., 2009; Willems et al., 2018) (**Fig1A**). While the Last  
72 Eukaryotic Common Ancestor (LECA) executed all these regulatory functions with a  
73 single AK, widespread gene duplication produced variable numbers of paralogues in  
74 diverse eukaryotic subgroups (Hochegger et al., 2013). Many eukaryotic lineages  
75 have retained the singular ancestral AK, including baker's yeast, *Saccharomyces*  
76 *cerevisiae* (Ipl1) (Buvelot et al., 2003), the slime mould *Dictyostelium discoideum*  
77 (aurK) (Liu et al., 2008) and the intestinal parasite *Giardia intestinalis* (Davids et al.,  
78 2008; Siman-Tov et al., 2001). *Caenorhabditis spp.* (air-1 and 2) and *Drosophila spp.*  
79 (aurA and B) have two AKs (Carmena and Earnshaw, 2003). Some lineages have  
80 three AKs: for example, mammals (Aurora A to C) (Carmena and Earnshaw, 2003),  
81 flowering plants (Aurora 1 to 3)(Kawabe et al., 2005) , kinetoplastid parasites (AUK 1  
82 to 3) (Fassolari and Alonso, 2019) and apicomplexan parasites (ARK1 to 3) (Berry et  
83 al., 2018; Berry et al., 2016).

84 How, when and which functions are executed by each of the Aurora paralogues  
85 (either single or multiple) varies extensively between these eukaryotic lineages.  
86 Generally, a frequent division of labour between paralogues has been proposed,  
87 which appears to be correlated with the various scaffolds that direct their subcellular  
88 location and activation (Hochegger et al., 2013), and a common pattern is found in  
89 most species. One paralogue (in humans, Aurora A) is called the “polar aurora”, due  
90 to its association with centrosomal subunits including Cep192 and the microtubule-  
91 assembly factor TPX2 (Carmena and Earnshaw, 2003; Willems et al., 2018), which  
92 govern the spindle (pole)-specific location. A second paralogue (in humans, Aurora  
93 B) has been designated the “equatorial aurora” as it localises to the midplane of a  
94 dividing cell to regulate chromosome bi-orientation on the metaphase spindle to  
95 mediate cytokinesis at the last stage of cell division (Carmena et al., 2009;  
96 Hochegger et al., 2013; Willems et al., 2018). The second paralogue associates with  
97 the chromosomal passenger complex (CPC), a heterotrimeric scaffold (comprised of  
98 INCENP, Survivin and Borealin) that provides local AK activity at inner centromeres  
99 and kinetochores until metaphase, after which it translocates to microtubules of the  
100 central spindle, to orchestrate cytokinesis (Hadders and Lens, 2022; Hindriksen et  
101 al., 2017). The third paralogue provides an evolutionary platform for novelty. In  
102 humans, Aurora C is a meiosis-specific Aurora B variant (Avo Santos et al., 2011). In

103 plants, kinetoplastids, and apicomplexans, the three ARKs are less well studied, but  
104 are likely contributing to the divergent aspects of cell division in these lineages.  
105 *Plasmodium* spp., the causative agents of malaria, belong to the phylum  
106 Apicomplexa, a group of intracellular, unicellular parasites with unusual aspects of  
107 division and multiplication. Previous phylogenetic analyses of Apicomplexa had  
108 identified three genes for Aurora Related Kinases (ARKs) 1, 2 and 3 in *Plasmodium*  
109 spp. (Reininger et al., 2011) and the coccidian *Toxoplasma gondii* (Tg) (Berry et al.,  
110 2018; Berry et al., 2016). In *Cryptosporidium* spp. only one ARK1 has been  
111 identified, suggesting an expansion of the ARK family in the common ancestor of  
112 *Plasmodium* and *Toxoplasma* (Berry et al., 2016). Broad functional characterisation  
113 of the three *Toxoplasma* ARKs identified TgARK1 as associated with the CPC  
114 component INCENP1, while TgARK2 located at centromeres (Berry et al., 2018;  
115 Berry et al., 2016). TgARK2 and TgARK3 have been shown to interact at the spindle  
116 and spindle pole, and cleavage furrow during cytokinesis, respectively. However,  
117 their associated molecular scaffolds and/or activators have not yet been  
118 characterised (Berry et al., 2018; Berry et al., 2016). Functional studies with both the  
119 human parasite *Plasmodium falciparum* and rodent parasite *Plasmodium berghei*  
120 have suggested that all three Plasmodium ARKs are likely essential for proliferation  
121 in asexual blood stage schizogony (Bushell et al., 2017; Solyakov et al., 2011;  
122 Tewari et al., 2010). Further characterisation of ARK1 and ARK3 was limited to  
123 asexual blood stages of *P. falciparum* (Berry et al., 2016), with PfARK1 shown to be  
124 potentially associated with spindle poles (Reininger et al., 2011). Nothing is known  
125 about the location or involvement of any scaffold/activator for ARK2 in *Plasmodium*  
126 spp.

127 Within the mosquito host, mitotic process differs substantially from that in asexual  
128 blood stage schizogony, in which closed mitosis is associated with asynchronous  
129 nuclear division that precedes cytokinesis. During male gametogenesis in the  
130 mosquito gut, rapid mitosis is characterized by three-fold genome replication from 1N  
131 to 8N. Concomitant spindle formation and chromosome segregation happens within  
132 eight minutes without nuclear division, followed by karyokinesis and cytokinesis  
133 resulting in haploid male gametes. Meiosis commences within 24 hours of  
134 fertilisation during zygote differentiation, with an initial genome duplication from 2N to  
135 4N. Reductive divisions occur in the subsequent oocyst, through endomitotic cycles  
136 resulting in haploid sporozoites (Guttery et al., 2022; Zeeshan et al., 2020b). Our  
137 previous studies have demonstrated an unconventional toolkit of cell cycle proteins,  
138 where mitotic protein kinases and phosphatases regulate these processes (Guttery  
139 et al., 2014; Roques et al., 2015; Tewari et al., 2010). In addition to the three  
140 divergent ARKs, seven CDK-related kinases, and four divergent Nima-like kinases  
141 have been identified in the Plasmodium genome. However, *Plasmodium* spp. seem  
142 to have lost many common cell division kinases such as Bub1, Mps1 and Polo,  
143 making their complement of cell division kinases quite different from other model  
144 eukaryotes (Guttery et al., 2014; Guttery et al., 2022; Tewari et al., 2010) (**Fig1B**). In  
145 addition, the presence and role of scaffold proteins for *Plasmodium* ARKs is poorly  
146 understood.

147 Here, we have performed an extensive evolutionary analysis of the AK family and  
148 used *P. berghei* to identify and characterise at the functional level the plasmodial  
149 ARK2. We used fluorescent real-time live-cell imaging, antibody-based protein  
150 pull-down, bioinformatics and functional genetic studies at distinct proliferative stages  
151 within the mosquito host to reveal that ARK2 is located at the spindle and associated  
152 with a novel protein complex that includes the microtubule plus-end tracking protein,  
153 EB1. We find that both ARK2 and EB1 are critical components for spindle dynamics  
154 and the rapid cycles of chromosome segregation and are therefore crucial factors in  
155 parasite transmission.  
156

## 157 Results

158

### 159 Evolutionary history of spindle kinases suggests divergent roles for Aurora- 160 Related Kinase 2 and 3 in *Plasmodium* spp.

161 To gain insight into the functional roles of ARKs during *P. berghei* cell division, we  
162 first re-evaluated their evolutionary history (**Fig 1A-C**). We constructed new and  
163 previously established phylogenetic profiles (Komaki et al., 2022; Kops et al., 2020;  
164 van Hooff et al., 2017) for AKs, related mitotic kinases and their location-specific  
165 scaffolds and activators in a wide variety of eukaryotes (**Fig 1B, Table S1**). We  
166 found a pervasive loss of Aurora scaffold proteins (Survivin, Borealin, TPX2, Cep192  
167 and BORA) in the common ancestor of *Plasmodium* and *Toxoplasma*, that correlated  
168 with the loss of the widely conserved centromere/spindle kinases (Mps1, Bub1 and  
169 Polo), and the expansion of both CPC subunit INCENP (2 paralogues) and the AK  
170 family (3 paralogues). Flowering plants (*Arabidopsis thaliana*) and kinetoplastids  
171 (*Trypanosoma brucei*, Tb) have also lost to a different extent. Kinetoplastids are the  
172 only known example of organisms with the functional analogous replacement of lost  
173 subunits Survivin and Borealin by TbCPC2 (Davids et al., 2008) and the basal body  
174 scaffold TbABP67 for Cep192, respectively (Akiyoshi, 2020) (**Fig 1B, Table S1**). To  
175 explore whether patterns of AK sub-functionalization after duplication that are  
176 common in eukaryotes might also apply to ARK1 to 3, we defined five different AK  
177 subcellular locations: (I) centromere, (II) spindle microtubule, (III) spindle pole, (IV)  
178 central spindle, and (V) cyto/nucleoplasm (**Fig 1A-C**). We mapped each of the  
179 paralogues formed after the inferred duplication events found in model eukaryotes  
180 onto these locations (Hochegger et al., 2013). Our results corroborated the  
181 previously suggested pattern of recurrent sub-functionalization after the first  
182 duplication event into an 'equatorial' (CPC-associated) and 'polar' (spindle-  
183 associated) AK paralogue (**Fig 1C**). All duplications are shared between *Plasmodium*  
184 spp. and *T. gondii*, with each paralogue being one-to-one orthologous, which  
185 strongly suggests they have the similar function. TgARK1 is located at the  
186 centromere and associated with INCENP1 and 2, but it is not at the central spindle or  
187 cleavage furrow during cytokinesis, unlike TgARK3 (Berry et al., 2016). Similarly,  
188 PfARK1 is located at, or near the spindle pole (Reininger et al., 2011) suggesting  
189 that apicomplexan ARK1 is the centromere-based equatorial-like AK. The second  
190 duplication event in mammals (Aurora B: Aurora C) and plants (AUR1:AUR2) gave  
191 rise to paralogues with similar localization profiles, with the event in mammals  
192 targeting the equatorial AK, and in plants the polar/spindle AK. In kinetoplastids, this  
193 distinction is less pronounced, with only one AK (AUR1) retaining ancestral  
194 functions, and the other paralogues (AUK2/3) are highly divergent (Akiyoshi, 2020).  
195 TgARK2 and TgARK3 are both associated with the spindle or spindle pole,  
196 consistent with the pattern of sub-functionalization after duplication, although  
197 TgARK3 has an unknown function at the cleavage furrow during cytokinesis.  
198 Strikingly, both ApiARK2 and ApiARK3 are considerably larger in size (~1500 to  
199 3500 residues) than other AKs (~300 to 350 residues) including ApiARK1 (**Fig 1C**).  
200 Apart from coiled-coils and asparagine-rich regions, no clear conserved sequence or

201 structural features were identified in Plasmodium ARK2/3 indicative of binding to  
202 additional putative interaction partners (**Fig 1C**). In summary, Plasmodium ARK2 and  
203 ARK3 are highly divergent AK paralogues, but our evolutionary reconstructions  
204 strongly implicate a role for these proteins at the spindle, and/or spindle pole.

205

### 206 **ARK2 is expressed in the nucleus throughout the *P. berghei* life cycle**

207 To investigate the expression and subcellular location of ARK2, we generated a  
208 transgenic parasite line by single crossover recombination at the 3' end of the  
209 endogenous *ark2* locus to express a C-terminal GFP-tagged fusion protein (**Fig**  
210 **S1A**). PCR analysis of genomic DNA using locus-specific diagnostic primers  
211 indicated correct integration of the GFP tagging construct (**Fig S1B**). ARK2-GFP  
212 parasites completed the full life cycle, with no detectable phenotype resulting from  
213 the GFP tagging. Expression and location of ARK2-GFP were assessed by live cell  
214 imaging; ARK2-GFP was observed in all developmental stages including asexual  
215 (blood schizogony and sporogony) (**Fig S1C, D**) and sexual (gametogony and  
216 ookinete development) (**Fig S1E, F**) stages. ARK2-GFP showed a punctate nuclear  
217 pattern with one or two focal points during blood schizogony (**Fig S1C**) and  
218 sporogony (**Fig S1D**). It was present at a single focal point with an additional more  
219 diffuse nuclear location during early stages of male gametogony (30 sec after  
220 activation) and in the zygote (2h after fertilization) (**Fig S1E, F**), but in later stages it  
221 had a more dynamic location on the spindle and spindle pole as described in the  
222 next sections. Interestingly, ARK2-GFP was not detected in mature asexual  
223 (merozoites and sporozoites) and sexual (male gametes and ookinetes) stages of  
224 development (**Fig S1C-F**).

225

### 226 **Spatiotemporal dynamics of ARK2-GFP during male gametogony** 227 **demonstrates its association with rapid spindle dynamics.**

228 ARK2 expression was analysed during the rapid mitosis of male gametogony to  
229 understand its spatiotemporal dynamics in real time. Prior to gametocyte activation,  
230 ARK2-GFP was detected as a diffuse signal within the nucleus of most gametocytes  
231 although some had a single concentrated focus (**Fig 2A**). One minute after  
232 activation, the protein was concentrated at a single point in the nucleus, before  
233 extending into an elongated bridge-like structure, which collapsed into two separate  
234 points within the next one to two minutes (**Fig 2B, Video S1**). Each separate point  
235 extended into a bridge before collapsing and resulting in four separate foci (**Fig S1G,**  
236 **Video S2**). A repeat of this cycle resulted in eight foci, all within 8 minutes (**Fig S1H,**  
237 **Video S3**). Once mature male gamete formation (exflagellation) began, these foci  
238 faded, leaving a diffuse nuclear signal (**Fig 2A**). These cycles of extension and  
239 collapse to individual foci often started and finished asynchronously with respect to  
240 other similar events of spindle bridge and foci within a single nucleus – suggesting  
241 that mitosis in male gametogony is an asynchronous form of cell division (**Fig 2A**).  
242 The events of spatiotemporal localization of ARK2-GFP were consistent with their  
243 phenotype (**Fig S2A**).

244 To examine further the location of ARK2 we investigated by indirect  
245 immunofluorescence assay (IFA) its co-localization with microtubules (MTs) that had  
246 been labelled with an  $\alpha$ -tubulin antibody, using fixed gametocytes at different times  
247 after activation. Alpha-tubulin antibody detected both nuclear mitotic spindles and  
248 developing cytoplasmic axonemes, but ARK2 colocalized only with the mitotic  
249 spindles at all stages of gametogony (**Fig S2B**). This result provides evidence that  
250 ARK2 is involved in mitosis within the male gametocyte. To improve the resolution of  
251 detection, we used deconvolution microscopy and confirmed that ARK2 is located on  
252 mitotic spindles during male gametogony (**Fig S2C**).

253

254 **ARK2 and kinetochore dynamics are associated, but cytoplasmic axonemal**  
255 **microtubule dynamics are not, during male gametogony.**

256 To investigate further the association of ARK2 and the mitotic spindle during male  
257 gametogony, we compared its location with that of the kinetochore marker NDC80  
258 and cytoplasmic axonemal protein kinesin-8B. Parasite lines expressing ARK2-  
259 mCherry and NDC80-GFP were crossed, and the progeny were analysed by live-cell  
260 imaging to establish the spatiotemporal relationship of the two tagged proteins. The  
261 location of both ARK2-mCherry and NDC80-GFP was next to the stained DNA, and  
262 with a partial overlap, although NDC80-GFP was always closer to the DNA (**Fig 2C**  
263 **and Fig S3A**). This orientation of ARK2-mCherry and NDC80-GFP remained  
264 throughout male gametogony. Furthermore, the bridge length of NDC80-GFP was  
265 shorter than that of ARK2-mCherry. Time lapse imaging showed that the dynamic  
266 redistribution of ARK2-mCherry begins prior to that of NDC80-GFP and ends slightly  
267 earlier (**Fig 2D, Fig S3B, Video S4 and Video S5**).

268 Parasite lines expressing ARK2-GFP and kinesin-8B-mCherry were crossed and  
269 examined by live cell imaging of both markers. One to two minutes after gametocyte  
270 activation, ARK2-GFP was observed close to the DNA and adjacent to, but not  
271 overlapping, the kinesin-8B-mCherry tetrad (**Fig 2E and Fig S3C**). ARK2-GFP  
272 remained distributed on spindles, while there was duplication of kinesin-8B-mCherry-  
273 labelled tetrads (**Fig 2E and Fig S3C**). In later stages of male gametogony, ARK2-  
274 GFP remained associated with spindles and spindle poles, while kinesin-8B-mCherry  
275 showed a distinct cytoplasmic axonemal location (**Fig 2E and Fig S3C**). This  
276 location pattern was also observed in time-lapse imaging, with no colocalisation of  
277 ARK2-GFP and Kinesin-8B-mCherry (**Fig 2F, Fig S3D, Video S6 and Video S7**).  
278 The dynamic distribution of these two proteins demonstrates that both chromosome  
279 segregation in the nucleus, tagged with ARK2, and axoneme formation in the  
280 cytoplasm, tagged with kinesin-8B begin at a very early stage of gametogony,  
281 continuing in parallel within different compartments of the male cell.

282 To examine further the location of ARK2 with reference to the spindle, axoneme and  
283 kinetochore at high resolution; we used super resolution confocal stimulated  
284 emission depletion (STED) microscopy, ultrastructure expansion microscopy (UExM)  
285 and 3D-structured illumination microscopy (SIM) (**Fig 2G-I**). STED images of fixed  
286 gametocytes labelled with anti-GFP, and anti- $\alpha$ -tubulin antibodies revealed the ARK2  
287 distribution on nuclear spindle MTs (**Fig 2G, Fig S4**). This visualization was further



288 improved by UExM on fixed gametocytes labelled with anti-HA antibodies (for ARK2)  
289 and anti- $\alpha/\beta$ -tubulin antibodies (for spindle and axonemes). UExM images clearly  
290 showed the ARK2 signal overlapping with spindle MTs and not with cytoplasmic  
291 axonemal MTs (**Fig 2H, Fig S4B**). These observations further indicate that ARK2  
292 distributes on spindle MTs. Next, we used 3D-SIM on fixed gametocytes expressing  
293 both ARK2-mCherry and NDC80-GFP, which clearly showed the ARK2 bridge  
294 across the full width of the gametocyte nucleus that is associated with punctate  
295 NDC80-labelled kinetochores (**Fig 2I, Fig S4C**).

296

### 297 **Tracing ARK2-GFP location during the zygote to ookinete transition indicates** 298 **a role at the meiotic spindle.**

299 To characterize the location of ARK2 in meiotic (i.e. zygote/ookinete) stages, ARK2-  
300 GFP dynamics were observed in developing ookinetes over a 24 h period. At various  
301 points of ookinete development, ARK2-GFP was detected as focal points like those  
302 observed during male gametogony, as well as structures radiating into the nuclear  
303 equator (**Fig 3A**). In zygotes (2h after gametocyte activation and fertilisation), ARK2-  
304 GFP was detected at one or two foci. These foci migrated away from each other over  
305 the next 8-10h through development into stage IV ookinetes, to opposite sides of the  
306 nucleus (**Fig 3A**). During this time, the ARK2-GFP signal appeared to radiate into the  
307 centre of the nucleus, typical of a classic metaphase spindle arrangement (**Fig 3A**).  
308 These two foci then divided again to form four foci, before the signal faded into a  
309 diffuse distribution within nuclei of mature ookinetes (**Fig 3A**). The location of ARK2  
310 relative to that of the kinetochore marker, NDC80, was examined during ookinete  
311 development in parasite lines expressing ARK2-mCherry and NDC80-GFP. ARK2-  
312 mCherry was located on spindles radiating from the poles and NDC80-GFP was  
313 detected along the metaphase plate (**Fig 3B**) during stages I to III. By stage IV both  
314 ARK2 and NDC80 had accumulated at spindle poles (**Fig 3B**).

315

### 316 **Conditional knockdown of ARK2 reveals a crucial role during parasite** 317 **transmission.**

318 ARK2 had previously been found to be most likely essential for asexual blood stage  
319 development (Tewari et al., 2010). To examine the role of ARK2 during sexual  
320 stages we first tagged the endogenous ARK2 locus with sequence encoding an  
321 auxin-inducible degron (AID) and an HA epitope tag (**Fig S5A**) to degrade the fusion  
322 protein in the presence of auxin in a parasite line expressing the TIR1 protein (Philip  
323 and Waters, 2015). Although the genetic modification was confirmed by diagnostic  
324 PCR (**Fig S5B**), addition of auxin to gametocytes did not lead to ARK2-AID/HA  
325 degradation (**Fig S5C**) and there was no detectable phenotype in male gametogony  
326 (**Fig S5D**). Since the AID system was unsuccessful, we used a promoter trap  
327 strategy, replacing the *ark2* promoter with that of cytoadherence-linked asexual  
328 protein (CLAG – PBANKA\_1400600), which is not transcribed in gametocytes  
329 (Sebastian et al., 2012) (**Fig S5E**). The correct genetic integration was confirmed by  
330 PCR (**Fig S5F**), and ARK2 transcription was downregulated in *P<sub>clag</sub>-ark2*  
331 gametocytes as shown by qRT-PCR (**Fig S5G**). A phenotypic analysis of these *ark2*-

332 knockdown parasites was then performed at different stages of parasite  
333 development within the mosquito.

334 Despite the significant reduction of ARK2 expression in *P<sub>clag-ark2</sub>* gametocytes (**Fig**  
335 **S5G**), neither mitosis in male gamete formation (exflagellation) nor meiosis in zygote  
336 differentiation (ookinete development) were affected (**Fig 4A, B**). However, serious  
337 defects in oocyst formation (endomitosis) were observed, with a significant reduction  
338 (up to 70 %) in the number of oocysts per mosquito midgut, detectable from as early as  
339 as day 7 post-infection, and remaining significantly lower through to day 21 (**Fig 4C**).  
340 Microscopic imaging of the midguts revealed that the few oocysts present were  
341 smaller than those of wild-type parasites expressing GFP (WT-GFP) after day 7.  
342 Sporogony had been completely blocked; some parasites contained dark granules,  
343 and some had a pycnotic appearance (**Fig 4D**). *P<sub>clag-ark2</sub>* oocysts were significantly  
344 smaller than wild-type from day 14 onwards, not growing beyond the size observed  
345 at day 7 (**Fig 4E**). There were no sporozoites in the salivary glands of *P<sub>clag-ark2</sub>*  
346 parasite-infected mosquitoes, indicating that sporozoite development had been  
347 completely blocked even though some oocysts had formed (**Fig 4F**).

348 One explanation for the significantly reduced number of *P<sub>clag-ark2</sub>* compared to WT-  
349 GFP oocysts, was reduced ookinete motility. However, when we analysed ookinete  
350 motility on Matrigel, we saw no remarkable difference in the gliding motility of *P<sub>clag-</sub>*  
351 *ark2* (**Video S8**) compared with WTGFP parasites (**Video S9**) (**Fig S6A, B**).

352 Since ARK2 is expressed in male gametocytes and parasite development is affected  
353 after fertilization, we investigated whether the defect is due to inheritance from the  
354 male gamete. We performed genetic crosses between *P<sub>clag-ark2</sub>* parasites and other  
355 mutants deficient in production of either male (*Δhap2*) (Liu et al., 2008) or female  
356 (*Δdozi*) gametocytes (Mair et al., 2006). Crosses between *P<sub>clag-ark2</sub>* and *Δdozi*  
357 mutants produced some normal-sized oocysts that were able to sporulate, showing a  
358 partial rescue of the *P<sub>clag-ark2</sub>* phenotype (**Fig 4G**). In contrast, crosses between  
359 *P<sub>clag-ark2</sub>* and *Δhap2* did not rescue the *P<sub>clag-ark2</sub>* phenotype. These results reveal  
360 that a functional *ark2* gene copy from a male gamete is required for subsequent  
361 oocyst development.

362

363 **Transcriptome analysis of *P<sub>clag-ark2</sub>* parasites reveals altered expression of**  
364 **genes for proteins involved in several functions including microtubule-based**  
365 **motor activity.**

366 To explore the effect of ARK2 knockdown on the expression of other genes in  
367 gametocytes, we performed RNA-seq transcriptomic analysis of *P<sub>clag-ark2</sub>* and wild-  
368 type cells immediately prior to gametocyte activation (0 min) and after exflagellation  
369 (30 min post activation). The genome-wide read coverages for the four pairs of  
370 biological replicates (WT, 0 min; WT, 30 min; *P<sub>clag-ark2</sub>*, 0 min; and *P<sub>clag-ark2</sub>*, 30  
371 min) exhibited Spearman correlation coefficients of 0.961, 0.939, 0.972 and 0.930;  
372 respectively, validating the reproducibility of the experiment. The downregulation of  
373 *ark2* gene expression in *P<sub>clag-ark2</sub>* gametocytes was confirmed by the RNA-seq  
374 analysis: the number of reads mapped to this gene was significantly decreased (**Fig**  
375 **S6C**).

376 In addition to changed ARK2 expression, we detected 446 and 102 genes that were  
377 significantly upregulated and downregulated respectively in *P<sub>clag</sub>-ark2* gametocytes  
378 activated for 30 min (**Fig 4B and Table S2**). Gene ontology (GO) enrichment  
379 analysis of the upregulated genes identified genes involved in microtubule-based  
380 processes—including microtubule-dependent motors—together with other functions  
381 including cell division and chromosome organization (**Fig S6D**). These differences in  
382 transcript levels revealed by RNA-seq analysis were validated by qRT-PCR, focusing  
383 on genes for proteins involved in motor activity, other AKs, kinetochore proteins and  
384 genes for proteins implicated in ookinete and oocyst development (**Fig 4I**). The  
385 modulation of these genes suggests the involvement of ARK2 in mitosis in male  
386 gametocytes, although the effect manifested only later during sporogony.

387

### 388 **ARK2 interacts with microtubule-binding proteins near the spindle-kinetochore** 389 **interface.**

390 Until now, no scaffold or activator proteins that associate with apicomplexan ARK2  
391 orthologues have been described. We therefore aimed to identify candidates  
392 interacting with ARK2. We first performed an immunoprecipitation experiment using  
393 anti-GFP trap beads on extracts of gametocytes expressing ARK2-GFP or GFP  
394 alone and activated for 1 min (when the first spindle is formed as described above).  
395 Lysates were prepared in the presence of limited amounts of cross-linking  
396 paraformaldehyde to stabilise protein complexes (**Fig 5A**). Immunoprecipitated  
397 proteins were then digested with trypsin prior to identification by mass spectrometry.  
398 Comparative proteomic analysis, using principal component analysis (PCA) of the  
399 GFP control and ARK2-GFP precipitates, revealed that ARK2 associates with  
400 several microtubule-associated proteins located at, or near the spindle and  
401 kinetochore (**Fig 5B, Table S3**). Generally, few unique peptides were identified for  
402 each protein except for ARK2 itself, suggesting that their binding to ARK2 may be  
403 transient or that much of ARK2 is not bound to other proteins at this stage. The  
404 interacting proteins identified include the spindle MT-associated proteins kinesin-8X  
405 (PBANKA\_0805900), myosin K (PBANKA\_0908500), the MT plus-end tracker EB1  
406 (PBANKA\_0405600), a variety of kinetochore proteins such as members of the  
407 NDC80 complex (Zeeshan et al., 2020b) and the recently discovered highly  
408 divergent Apicomplexan Kinetochore proteins (AKiT) AKiT1-6, STU2  
409 (PBANKA\_1337500), Mad1 (PBANKA\_0612300) (Brusini et al., 2022), and a single  
410 peptide for the CPC subunit INCENP2 (PBANKA\_1343200) (**Fig 5B, Table S3**).  
411 Interestingly, the strongest evidence for an ARK2 interaction was obtained for the  
412 nuclear formin-like protein MISFIT, a key regulator of ookinete-oocyst transition  
413 (Bushell et al., 2009), and a putative regulator of actin filament dynamics. We also  
414 found peptides from subunits of the Origin of Replication Complex (ORC; e.g. ORC-  
415 1/-2/-5, Cdc6 and Cdt1), and the alpha subunits of delta and epsilon DNA  
416 polymerases, which are common contaminants of immunoprecipitates from male  
417 gametocytes, possibly due to their high concentrations in the rapid cycles of  
418 replication (**Fig 5B**).

419

420 **Real time live cell imaging of parasites expressing EB1-GFP reveals its**  
421 **association with the spindle and kinetochore throughout male gamete**  
422 **formation.**

423 Our results suggested that ARK2 is located on the spindle and interacts with  
424 kinetochore components, as well as the spindle-based MT end-binding protein EB1.  
425 Therefore, we tagged EB1, encoded by the endogenous locus, with GFP (**Fig S7A,**  
426 **B**) and studied its spatiotemporal dynamics during male gametogony using real time  
427 live-cell imaging. EB1-GFP showed a similar spatiotemporal distribution to that of  
428 ARK2-GFP, with distinct foci and elongated spindle ‘bridges’ at certain time points  
429 after gametocyte activation (**Fig 6A, Fig S7C-E, Video S10-12**). Chromatin  
430 immunoprecipitation with parallel sequencing (ChIP-Seq) was used to determine the  
431 DNA binding sites of EB1, and indicated its co-location with the outer kinetochore  
432 marker NDC80 centromeric chromatin marker (Iwanaga et al., 2012; Zeeshan et al.,  
433 2020b) (**Fig 6B**). These results were corroborated by live-cell imaging of EB1-  
434 GFP/NDC80-mCherry dual reporter lines (**Fig 6C, Fig S7F**). An additional cross to  
435 produce EB1-GFP/ARK2-mCherry parasites showed overlap of fluorescence signals  
436 at 1 to 2 min post-activation of gametocytes, confirming their co-location and  
437 interaction with spindles and the kinetochore (**Fig 6D**). Finally, parasite lines  
438 expressing EB1-mCherry and the basal body marker SAS4-GFP (Zeeshan et al.,  
439 2022) showed EB1’s association with the formation of basal bodies that serves as  
440 the MT organising centre for axonemes (**Fig 6E**).

441 To further resolve the location of EB1 with respect to the kinetochore and basal body  
442 at higher resolution, 3D-SIM was performed on EB1-GFP/NDC80-mCherry, EB1-  
443 GFP/ARK2-mCherry and EB1-mCherry/SAS4-GFP fixed gametocytes. The 3D-SIM  
444 images of gametocytes expressing EB1-GFP/NDC80-mCherry showed EB1  
445 bridge(s) across the nucleus with NDC80 distributed like beads on the bridge, each  
446 bead representing a kinetochore (**Fig 6F, Fig S8A**). The 3D-SIM images of  
447 gametocytes expressing EB1-GFP/ARK2-mCherry showed EB1 bridge(s) across the  
448 nucleus with ARK2, overlapping each other (**Fig 6G, Fig S8A**). The bridged pattern  
449 of spindles for EB1 were restricted to the nucleus as shown by 3D-SIM images of  
450 gametocytes expressing EB1-mCherry/SAS4-GFP; whereby SAS4 was located in  
451 the cytoplasm but aligned with the EB1 bridge in the nucleus (**Fig 6H, Fig S8A**)  
452 (Zeeshan et al., 2022). We also performed STED microscopy on fixed EB1-GFP  
453 gametocytes stained with anti-GFP and anti-tubulin antibodies, which confirmed  
454 EB1’s location on the spindle: the images showed EB1 distribution on the nuclear  
455 spindle MTs with a distribution like that of ARK2 (**Fig 6I, Fig S8B**). These real time  
456 imaging data, together with the interactome data, confirm that ARK2 and EB1 form a  
457 functional/structural axis associated with the spindle and the acentriolar MTOC, and  
458 are associated with kinetochore dynamics.

459

460 **EB1-GFP is enriched at spindles and associated with apical polarity during**  
461 **ookinete differentiation.**

462 Live cell imaging of EB1-GFP during early meiosis located the protein on spindles  
463 and spindle poles, but it then disappeared as the ookinete matured, with a pattern

464 similar to that observed for ARK2-GFP (**Fig S9**). There was also an accumulation of  
465 EB1-GFP at the nascent apical end of the developing ookinete, potentially important  
466 in defining its polarity. In later stages of ookinete differentiation, it was distributed  
467 around the periphery of the growing protuberance, potentially associated with sub-  
468 pellicular MTs (**Fig S9**) but had disappeared in mature ookinetes.

469

#### 470 **EB1 is not essential for asexual blood stage proliferation, but like ARK2 its** 471 **deletion affects endomitosis during sporogony.**

472 We showed that ARK2 and EB1 have similar spatiotemporal dynamics but wanted to  
473 establish whether deletion of the EB1 gene would have a similar phenotype to that of  
474 an ARK2 mutant line. We therefore generated an EB1 gene deletion mutant ( $\Delta eb1$ )  
475 via double homologous recombination (**Fig S10A, B**). This deletion had no effect on  
476 asexual blood stage parasite development, in contrast to ARK2 that is essential  
477 during blood schizogony (Tewari et al., 2010). Male gamete formation  
478 (exflagellation), fertilisation and zygote differentiation (ookinete development) were  
479 also not affected in  $\Delta eb1$  parasites (**Fig 7A, B**). However, deletion of *eb1* resulted in  
480 significantly reduced oocyst numbers on day-10 post-infection of mosquitoes (**Fig**  
481 **7C**). The oocysts that were present were smaller than those of WT parasites (**Fig**  
482 **7D**), and by day-21 no oocysts were detectable (**Fig 7C, D**) suggesting that  
483 development was completely blocked at some point beyond day-10.

484 Finally, to determine the global pattern of transcription in  $\Delta eb1$  gametocytes we  
485 performed RNA-seq analysis 30 minutes after activation. This analysis revealed that,  
486 in addition to the complete absence of EB1 transcripts (**Fig 7E**), 129 and 411 genes  
487 were significantly downregulated and upregulated respectively (**Fig 7F and Table**  
488 **S4**). GO enrichment analysis of upregulated genes identified proteins involved in  
489 phosphorylation, transcription, and microtubule movement (**Fig S10C**).

490

#### 491 **EB1-GFP protein pulldown identifies EB1-MISFIT-MyoK as a putative** 492 **anchoring complex for ARK2 on spindle MTs**

493 To further analyse the putative interaction of ARK2-GFP with EB1, we performed a  
494 reciprocal immunoprecipitation of EB1-GFP, from lysates of paraformaldehyde  
495 cross-linked gametocytes one-minute post activation (**Fig 8A, Table S3**).  
496 Comparative proteomic analysis of the identified proteins (EB1-GFP versus GFP  
497 alone) revealed a pattern of putative interactions for EB1 very similar to that of  
498 ARK2, in particular many peptides derived from myosin K and MISFIT. These results  
499 suggest that a complex or multiple interactions between EB1, MISFIT, myosin K and  
500 ARK2 are present in male gametocytes one minute post activation (**Fig 8A**). Other  
501 peptides were derived from components of the kinetochore including INCENP2,  
502 ARK1, Stu2 and AKIT1<sup>KNL1</sup>, suggesting that EB1 associates with the spindle-  
503 kinetochore interface in a similar way to ARK2. Lastly, we found a strong enrichment  
504 of SMC proteins in comparison with GFP alone and ARK2-GFP precipitates,  
505 including condensin (SMC2/4) and cohesin (SMC1/3) components, as well as  
506 proteins involved in DNA replication (MCM, ORC and RFC).

507 To further assess whether ARK2, EB1, MISFIT and MyoK associate during male  
508 gametogony, we compared ARK2-GFP and EB1-GFP immunoprecipitates.

509 We reasoned those proteins that would be part of the same protein complex and/or  
510 cellular structure should show subtle yet clear co-variation amongst the different  
511 PbARK2/EB1-GFP and GFP-only immuno-pulldowns. We therefore used PCA of the  
512 combined datasets of unique peptide spectral counts per protein for GFP, ARK2-  
513 GFP and EB1-GFP pulldowns (**Fig 8B**). Using the  $\ln(x)+1$  transformed peptide  
514 values (with non-detected peptide values set to 0), our PCA captures 88.5 % of the  
515 variation amongst the data in the first two principal components (see for other  
516 principal components **Table S3**). We also found clear clustering for *Pb*ARK2,  
517 MISFIT, EB1 and MyoK, consistent with their close association (**Fig 8B**) and a  
518 similar pattern for ARK2 and EB1 with the pre-replication complex component Cdc6  
519 (PBANKA\_1102900). Furthermore, we observed co-variation for Mad1 (AKi7),  
520 kinesin-8X, the RFC-like protein (PBANKA\_0202500) and two polymerase subunits  
521 (**Fig 8B**). Overall, we found co-variation in the PCA projection of the ARK2/EB1-GFP  
522 pulldown data of proteins that are likely part of the same cellular structures or  
523 complexes, such as the kinetochore, spindle and various complexes involved in DNA  
524 replication (MCM/RFC/ORC), and the cohesin (SMC1/3) and condensin (SMC2/4)  
525 complexes (**Fig 8B-C**), providing further confidence for the value of using PCA for  
526 accurate detection of protein complexes. ARK2 and EB1 appear to be transiently  
527 part of some of these complexes during male gametogony.

528 In conclusion, results obtained with our biochemical experiments, in combination with  
529 functional analyses, suggest that ARK2 and EB1 are part of a regulatory axis that  
530 likely includes MyoK and MISFIT located at, or near the spindle MT-kinetochore  
531 interface and are likely involved in the rapid cycles of spindle assembly and  
532 chromosome segregation during male gametogony.

533

534

## 535 Discussion

536

537 Aurora is a serine-threonine kinase family that is highly conserved in eukaryotes.  
538 Previous phylogenetic analyses had shown that the family evolved from a single  
539 ancestral kinase by widespread recurrent duplications throughout eukaryotic  
540 evolution (Willems et al., 2018). AKs play crucial roles in mitotic/meiotic entry, bipolar  
541 spindle assembly, chromosome segregation and cytokinesis; and work in  
542 conjunction with scaffold proteins like chromosome passenger protein (Hadders and  
543 Lens, 2022; Tang et al., 2017; Willems et al., 2018). The three divergent  
544 *Plasmodium* AKs are essential for asexual parasite proliferation in the mammalian  
545 host but their role in sexual stages and the presence or absence of scaffold proteins  
546 were unknown (Solyakov et al., 2011; Tewari et al., 2010). Here we focus on the  
547 location and function of *P. berghei* ARK2, an Aurora related protein and its unique  
548 scaffold/activator complex, in association with the end binding MT protein (EB1)  
549 during the unconventional mode of cell proliferation, differentiation and division  
550 during endomitosis and meiosis of sexual transmission stages within the mosquito  
551 host.

552 Our in-depth bioinformatics analysis confirmed the presence of three divergent ARKs  
553 and the absence of many scaffold proteins, corroborating earlier studies showing  
554 that *Plasmodium* lacks scaffold components like survivin and borealin (van Hooff et  
555 al., 2017). However, similar to what was reported in *Toxoplasma* (Berry et al., 2018)  
556 two members of INCENP are present. In human cells Aurora A associates with  
557 spindle microtubules and centrosomes while Aurora B is located at centromeres, the  
558 spindle and the midbody (Carmena and Earnshaw, 2003; Carmena et al., 2015;  
559 Hochegger et al., 2013). In other eukaryotes, similar patterns of sub-functionalisation  
560 are found (**Fig 1A-C**), with one paralog termed the equatorial AK (Aurora B in  
561 humans) and the other the polar AK (Aurora A in humans). Although it is difficult to  
562 assign the conserved AK homologue by similar subcellular location of *Plasmodium*  
563 ARK2, it appears that ARK2 is more similar to Aurora A due to its association with  
564 spindles and with the acentriolar inner MTOC. In such a scenario, ARK2 is the polar  
565 AK. Of the other ARKs in *Plasmodium*, we predict that ARK1 is most likely the  
566 equatorial AK due to its conventional AK length (**Fig 1C**) and the association of its  
567 one-to-one *T. gondii* ARK1 ortholog with INCENP1-2 (Berry et al., 2018). The  
568 presence of a third AK in *Plasmodium* suggests either an additional sub-  
569 functionalisation of the canonical equatorial/polar AKs or a new function may have  
570 been adopted by ARK3. For both ARK1 and ARK3, similar experiments as  
571 performed here need to be conducted to reveal their interactions and functions in the  
572 process of chromosome segregation and cell division in *Plasmodium*.

573 Using live cell imaging of male gametocytes, we show a very discrete and dynamic  
574 pattern of ARK2 location during mitosis. The protein transitions from a diffuse  
575 nuclear distribution before gametocyte activation to a location at the spindle poles  
576 and then moves with the spindle during the three mitotic cycles. A similar pattern is  
577 also observed during the first meiotic stages in the developing ookinete. There is no  
578 clear anaphase observed in these cells. Live cell imaging of dual fluorescent lines

579 expressing ARK2-GFP and either the kinetochore marker NDC80-mCherry or basal  
580 body marker Kinesin8B-mCherry demonstrates that ARK2 occupies a unique  
581 location, associated with both spindle MTs and the kinetochore during spindle  
582 formation, and is also located at the spindle pole at the inner acentriolar MTOC, but  
583 not at the cytoplasmic centriolar MTOC that includes the basal body marker SAS4 or  
584 Kinesin8B (Rashpa and Brochet, 2022; Zeeshan et al., 2022). STED microscopy  
585 with alpha-tubulin and super-resolution images of dual fluorescence-tagged lines  
586 further corroborate this unusual location of ARK2. The number of acentriolar  
587 MTOCs, defined by the location of ARK2-GFP during male gamete formation and  
588 zygote differentiation correlates with the ploidy of the cell, for example in the 2N, 4N  
589 or 8N male cell there were two, four or eight foci, and in the 4N ookinete there were  
590 four foci. Interestingly the ARK2-GFP signal disappeared by 12 hours of zygote  
591 development, when it is likely that the second meiotic division had taken place  
592 (without karyokinesis), whereas NDC80 was present until the end of the ookinete  
593 stage but in both cases four fluorescent foci are seen in the 4N ookinete.

594 EB1 is a plus-end MT tracking protein that accumulates at the growing ends of MTs  
595 and has a key role in the regulation of MT dynamics (Komarova et al., 2009). During  
596 male gametogony, EB1 had a location similar to that of ARK2 on the spindle and  
597 acentriolar MTOC. The parasite line expressing dual fluorescent-tagged EB1 and  
598 ARK2 showed that they are closely associated with each other at the different stages  
599 of development during both male gamete formation and zygote differentiation. STED  
600 imaging of EB1 showed that EB1 is associated with the spindle as was also  
601 observed for ARK2, suggesting that both are binding to spindle MTs. Intriguingly,  
602 EB1 was not detected in the proliferative asexual stages within red blood cells. This  
603 is in contrast to the presence of EB1 during the non-mitotic gametocytogenesis in *P.*  
604 *falciparum* (Li et al., 2022) and in asexual cell proliferation in *Toxoplasma* where EB1  
605 was observed associated with spindle MTs (Chen et al., 2015). These findings  
606 suggest that both ARK2 and EB1 may be a part of the spindle machinery and the  
607 acentriolar MTOC during male gamete formation and ookinete development.

608 Our previous *Plasmodium* kinome screen showed that ARK2 has an essential role  
609 during blood stage development (Tewari et al., 2010). Here we used conditional  
610 knockdown approaches to study the functional role of ARK2 in sexual stages and our  
611 results show that our *ark2* and *eb1* knockdown mutants have a similar phenotype to  
612 those of *Plasmodium*-specific cyclin, PbCYC3, and kinesin-8X, in which oocyst size  
613 and sporozoite formation were affected (Roques et al., 2015; Zeeshan et al., 2019b),  
614 and similar to what is observed in other deletion mutants including MISFIT, PK7 and  
615 PPM5 genes (Bushell et al., 2009; Guttery et al., 2014; Tewari et al., 2010). Genetic  
616 backcross experiments with *dozi* and *nek4* mutants that affect female and male  
617 gametogony, respectively, demonstrated that the *P<sub>clag</sub>-ark2* defect in oocyst  
618 development is inherited as a defect in the male gametocyte lineage, similar to what  
619 is observed for  $\Delta misfit$  and  $\Delta ppm5$ , for which there is an absolute requirement for a  
620 functional gene from the male line (Bushell et al., 2009; Guttery et al., 2014). These  
621 data suggest that both ARK2 and EB1 are part of the spindle assembly, and  
622 although male gametes and ookinetes are produced, downregulated ARK2



623 expression has a delayed effect that is seen during oocyst development and results  
624 in a complete block in parasite transmission.

625 Global transcript analysis showed significant differences in gene expression between  
626 the knockdown *P<sub>clag</sub>-ark2* parasites and WT lines. Genes coding for proteins involved  
627 in MT-based movement and regulation of gene expression were mostly affected,  
628 including a large number of protein kinases; several motor proteins (e.g. kinesin and  
629 dynein); and proteins involved in invasion or oocyst development. This finding is  
630 consistent with global phospho-proteomic studies of male gametogony, in which  
631 ARK2 was shown to be associated with rapid phosphorylation of MT proteins in  
632 either very early or late stages of male gamete formation (Invergo et al., 2017). It is  
633 possible that ARK2 phosphorylates various substrates including kinesin-8X, EB1,  
634 and MISFIT. In all these cases the genetic defect is transferred through the male  
635 lineage and manifest during endomitosis in the oocyst; thereby blocking parasite  
636 development and transmission.

637 Our results suggest that *Pb*ARK2 is largely localised on the spindle apparatus  
638 associated with kinetochores, suggesting that it is not part of a CPC-like complex.  
639 We confirmed the earlier phylogenetic studies that showed that CPC components  
640 like Survivin and Borealin are absent and ARK2-GFP immunoprecipitations identified  
641 unique candidate ARK2-interacting proteins. Kinetochores and proteins  
642 with a role at the spindle apparatus were identified. These proteins included the MT  
643 plus-end binding protein EB1, the myosin MyoK, a nuclear formin-like protein called  
644 MISFIT, members of the NDC80 outer kinetochore complex, and other  
645 Apicomplexan Kinetochores proteins (AKiTs). The presence of such interactors  
646 strongly suggests that ARK2 binds in proximity to the kinetochore-spindle MT  
647 interface. A reciprocal pulldown with EB1-GFP identified a similar set of interacting  
648 proteins as ARK2-GFP. Components of the kinetochore like MAD1, NDC80, STU2  
649 and AkiT were detected although no high abundance peptides were present in both  
650 ARK2 and EB1 pulldowns or highlighted by PCA. In addition, none of the TPX2  
651 complex components were detected, suggesting that ARK2 may not be exactly  
652 functionally similar to Aurora A (polar) of model eukaryotes (Willems et al., 2018).  
653 This presence of a unique plasmodium ARK2 scaffold protein and its localisation  
654 suggest that it may have a cross-functional role in relation to conventional Aurora A  
655 and Aurora B.

656 *Plasmodium* has only one EB1 homologue, compared to the three EB1 proteins that  
657 exist in other eukaryotes (Komarova et al., 2009). EB1 function is heavily regulated  
658 by protein phosphorylation: a cluster of six serine residues present in the linker  
659 region of the yeast EB1 homologue (Bim1) is phosphorylated by the AK homologue  
660 Ipl1, regulating disassembly of the spindle midzone during anaphase. Human EB1 is  
661 co-immunoprecipitated with Aurora B (Sun et al., 2008); the EB1 concentrates  
662 Aurora B at inner centromeres in a MT-dependent manner, resulting in  
663 phosphorylation of both kinetochore and chromatin substrates (Banerjee et al.,  
664 2014).

665 The interaction of ARK2 with EB1, MyoK and Misfit was revealed through co-  
666 variation of these proteins in ARK2 and EB1-GFP immunoprecipitates as measured

667 using PCA. These data suggest that ARK2 in *Plasmodium* may form a unique  
668 complex with these proteins that has not been described in other organisms. MyoK  
669 has been shown in many studies to be involved in mitosis in many organisms  
670 however MISFIT is a *Plasmodium* specific formin (Bushell et al., 2009). How ARK2  
671 interacts with EB1, MyoK and Misfit is unclear. Possibly its extended length, with the  
672 presence of a long-coiled coil in *Plasmodium* spp. (Fig 1C) facilitates interactions  
673 with other long coiled regions, such as found in MyoK for instance. It not known  
674 whether MyoK and Misfit are part of the spindle MT as seen for EB1, and this will  
675 need to be investigated in future studies. The presence of this unique association of  
676 these scaffold proteins suggest that it may be related to an unconventional mode of  
677 lateral spindle apparatus and chromosome segregation that is observed in these  
678 parasite sexual stages.

679 Overall, this study suggests that *Plasmodium* ARK2 is an Aurora paralogue that is  
680 located at the spindle and spindle poles formed by the acentriolar MTOC. It forms a  
681 unique association with EB1 and some kinetochore molecules but not in a way  
682 similar to Aurora B, which is CPC based (INCENP/Borealin/Survivin), nor Aurora A  
683 (TPX/Cep192/ BORA). Hence ARK2 uniquely interacts with a putative Aurora  
684 scaffold consisting of EB1/MISFIT/MyoK that is highly divergent compared to other  
685 eukaryotes, and that drives endomitosis and meiosis during parasite transmission.  
686 This suggests the flexibility of molecular networks to rewire and drive unconventional  
687 modes of spindle organisation and chromosome segregation during cell division in  
688 the malaria parasite *Plasmodium*.

689

## 690 **Materials and Methods**

691

### 692 **Ethics statement**

693 The animal work passed an ethical review process and was approved by the United  
694 Kingdom Home Office. Work was carried out under UK Home Office Project  
695 Licenses (30/3248 and PDD2D5182) in accordance with the UK 'Animals (Scientific  
696 Procedures) Act 1986'. Six- to eight-week-old female CD1 outbred mice from  
697 Charles River laboratories were used for all experiments.

698

### 699 **Generation of transgenic parasites and genotype analyses**

700 To generate the GFP-tag lines, a region of each gene (*ark2* and *eb1*) downstream of  
701 the ATG start codon was amplified, ligated to p277 vector, and transfected as  
702 described previously (Guttery et al., 2012). The p277 vector contains the human *dhfr*  
703 cassette, conveying resistance to pyrimethamine. A schematic representation of the  
704 endogenous gene locus, the constructs and the recombined gene locus can be  
705 found in **Fig S1A and S5A**. For the parasites expressing the C-terminal GFP-tagged  
706 protein, diagnostic PCR was used with primer 1 (Int primer) and primer 3 (ol492) to  
707 confirm integration of the GFP targeting construct (**Fig S1B and S5B**). A list of  
708 primers used to amplify these genes can be found in **Table S5**.

709 For the generation of transgenic *ark2*-AID/HA line, library clone PbG01-  
710 2471h08 from the PlasmogEM repository (<http://plasmogem.sanger.ac.uk/>) was

711 used. Sequential recombineering and gateway (GW) steps were performed as  
712 previously described (Pfander et al., 2013; Pfander et al., 2011). Insertion of the GW  
713 cassette following gateway reaction was confirmed using primer pairs GW1  
714 (CATACTAGCCATTTTATGTG) x *ark2* QCR1 (GCTTTGCAGCCGAAGCTCCG) and  
715 GW2 (CTTTGGTGACAGATACTAC) x *ark2* QCR2  
716 (AGGGGGAAAATGTTACACATGCGT). The modified library inserts were then  
717 released from the plasmid backbone using *NotI*. The *ark2*-AID/HA targeting vector  
718 was transfected into the 615-parasite line and conditional degradation of ARK-  
719 AID/HA in the non-clonal line was performed as described previously (Balestra et al.,  
720 2020). A schematic representation of the endogenous *ark2* locus, the constructs and  
721 the recombined *ark2* locus can be found in **Fig S3A**. A diagnostic PCR was  
722 performed for *ark2* gene knockdown parasites as outlined in **Fig S3A**. Primer pairs  
723 *ark2* QCR1/GW1, and *ark2* QCR2/GW2 were used to determine successful  
724 integration of the targeting construct at the 3' end of the gene (**Fig S3B**).

725 The conditional knockdown construct  $P_{clag}$ -*ark2* was derived from  $P_{clag}$   
726 (pSS367) by placing *ark2* under the control of the *clag* gene (PBANKA\_083630)  
727 promoter, as described previously (Sebastian et al., 2012). A schematic  
728 representation of the endogenous *ark2* locus, the constructs and the recombined  
729 *ark2* locus can be found in **Fig S3E**. A diagnostic PCR was performed for *ark2* gene  
730 knockdown parasites as outlined in **Fig S3E**. Primer 1 (5'-intPTD24) and Primer 2  
731 (5'-intPTD) were used to determine successful integration of the targeting construct  
732 at the 5' end of the gene. Primer 3 (3'-intPTclag) and Primer 4 (3'-intPTD24) were  
733 used to determine successful integration for the 3' end of the gene locus (**Fig S3F**).  
734 All the primer sequences can be found in **Table S5**.

735 To study the function of EB1, the gene-deletion targeting vector for *eb1* was  
736 constructed using the pBS-DHFR plasmid, which contains polylinker sites flanking a  
737 *T. gondii dhfr/ts* expression cassette conferring resistance to pyrimethamine, as  
738 described previously (Tewari et al., 2010). The 5' upstream sequence of *eb1* was  
739 amplified from genomic DNA and inserted into *Apal* and *HindIII* restriction sites  
740 upstream of the *dhfr/ts* cassette of pBS-DHFR. A DNA fragment amplified from the 3'  
741 flanking region of *eb1* was then inserted downstream of the *dhfr/ts* cassette using  
742 *EcoRI* and *XbaI* restriction sites. The linear targeting sequence was released using  
743 *Apal/XbaI*. A schematic representation of the endogenous *eb1* locus, the construct  
744 and the recombined *eb1* locus can be found in **Fig S7A**. The primers used to  
745 generate the mutant parasite lines can be found in **Table S5**. A diagnostic PCR was  
746 used with primer 1 (IntN138\_5) and primer 2 (ol248) to confirm integration of the  
747 targeting construct, and primer 3 (KO1) and primer 4 (KO2) were used to confirm  
748 deletion of the *eb1* gene (**Fig S7B, Table S5**). *P. berghei* ANKA line 2.34 (for GFP-  
749 tagging) or ANKA line 507cl1 expressing GFP (for the gene deletion and knockdown  
750 construct) parasites were transfected by electroporation (Janse et al., 2006).

751

## 752 **Live cell imaging**

753 To examine ARK2-GFP and EB1-GFP expression during erythrocytic stages,  
754 parasites growing in schizont culture medium were used for imaging at different

755 stages of schizogony. Purified gametocytes were examined for GFP expression and  
756 cellular location at different time points (0, 1-15 min) after activation in ookinete  
757 medium (Zeeshan et al., 2019b). Zygote and ookinete stages were analysed  
758 throughout 24 h of culture using cy3-conjugated 13.1 antibody (red), which  
759 recognises P28 protein on the surface of zygotes and ookinetes. Oocysts and  
760 sporozoites were imaged using infected mosquito guts. Images were captured using  
761 a 63x oil immersion objective on a Zeiss Axio Imager M2 microscope fitted with an  
762 AxioCam ICc1 digital camera.

763

### 764 **Generation of dual tagged parasite lines**

765 The green (GFP)- or red (mCherry)-tagged ARK2 and EB1 parasite lines were mixed  
766 with mCherry- or GFP-tagged lines of kinetochore marker NDC80 (Zeeshan et al.,  
767 2020b), axoneme marker kinesin-8B (Zeeshan et al., 2019a) and basal body marker  
768 SAS4 (Zeeshan et al., 2022) in equal numbers and injected into mice. Mosquitoes  
769 were fed on these mice 4 to 5 days after infection when gametocytemia was high,  
770 and were checked for oocyst development and sporozoite formation at day 14 and  
771 day 21 after feeding. Infected mosquitoes were then allowed to feed on naïve mice  
772 and after 4 to 5 days the mice were examined for blood stage parasitaemia by  
773 microscopy with Giemsa-stained blood smears. Some parasites expressed both  
774 ARK2-mCherry and NDC80-GFP; and ARK2-GFP and kinesin-8B-cherry in the  
775 resultant gametocytes, and these were purified, and fluorescence microscopy  
776 images were collected as described above.

777

### 778 **Parasite phenotype analyses**

779 Blood samples containing approximately 50,000 parasites of the *ark2*  
780 knockdown/*eb1* knockout lines were injected intraperitoneally (i.p) into mice to  
781 initiate infection. Asexual stages and gametocyte production were monitored by  
782 microscopy on Giemsa-stained thin smears. Four to five days post infection,  
783 exflagellation and ookinete conversion were examined as described previously  
784 (Guttery et al., 2012) with a Zeiss AxioImager M2 microscope (Carl Zeiss, Inc) fitted  
785 with an AxioCam ICc1 digital camera. To analyse mosquito infection and  
786 transmission, 30 to 50 *Anopheles stephensi* SD 500 mosquitoes were allowed to  
787 feed for 20 min on anaesthetized, infected mice with at least 15% asexual  
788 parasitaemia and carrying comparable numbers of gametocytes as determined on  
789 Giemsa-stained blood films. To assess mid-gut infection, approximately 15 guts were  
790 dissected from mosquitoes on days 7 and 14 post feeding and oocysts were counted  
791 using a 63x oil immersion objective. On day 21 post-feeding, another 20 mosquitoes  
792 were dissected, and their guts and salivary glands crushed separately in a loosely  
793 fitting homogenizer to release sporozoites, which were then quantified using a  
794 haemocytometer or used for imaging. Mosquito bite-back experiments were  
795 performed 21 days post-feeding using naive mice, and blood smears were examined  
796 after 3-4 days.

797

### 798 **Purification of gametocytes**

799 The purification of gametocytes was achieved by injecting parasites into  
800 phenylhydrazine treated mice (Beetsma et al., 1998) and gametocyte enrichment by  
801 sulfadiazine treatment after 2 days of infection. The blood was collected on day 4  
802 after infection and gametocyte-infected cells were purified on a 48% v/v NycoDenz  
803 (in PBS) gradient (NycoDenz stock solution: 27.6% w/v NycoDenz in 5 mM Tris-HCl,  
804 pH 7.20, 3 mM KCl, 0.3 mM EDTA). The gametocytes were harvested from the  
805 interface and activated.

806

### 807 **Immunoprecipitation and mass spectrometry**

808 Male gametocytes of ARK2-GFP and EB1-GFP parasites were used at 1 min post  
809 activation to prepare cell lysates. WT-GFP gametocytes were used as controls.  
810 Purified parasite pellets were crosslinked using formaldehyde (10 min incubation  
811 with 1% formaldehyde, followed by 5 min incubation in 0.125 M glycine solution  
812 and three washes with phosphate-buffered saline (PBS; pH 7.5).  
813 Immunoprecipitation was performed using the protein lysates and a GFP-Trap\_A Kit  
814 (Chromotek) following the manufacturer's instructions. Briefly, the lysates were  
815 incubated for 2h with GFP-Trap\_A beads at 4° C with continuous rotation. Unbound  
816 proteins were washed away, and proteins bound to the GFP-Trap\_A beads were  
817 digested using trypsin. The tryptic peptides were analysed by liquid  
818 chromatography–tandem mass spectrometry. Mascot  
819 (<http://www.matrixscience.com/>) and MaxQuant (<https://www.maxquant.org/>) search  
820 engines were used for mass spectrometry data analysis. Peptide and proteins  
821 having a minimum threshold of 95% were used for further proteomic analysis. The  
822 PlasmoDB database was used for protein annotation, and a separate manual  
823 curation was performed to classify proteins into 6 categories relevant for functional  
824 annotation of ARK2/EB1 immunoprecipitates: background, cohesin/condensin, DNA  
825 repair/replication, kinetochore, MTOC, spindle, proteasome and ribosome/translation  
826 (Metsalu and Vilo, 2015). The first six principal components for the analysis  
827 comparing ARK2/EB1/GFP-only samples can be found in **Table S3**.

828

### 829 **Ookinete motility assays**

830 The motility of *P<sub>clag-ark2</sub>* ookinetes was assessed using Matrigel as described  
831 previously (Volkmann et al., 2012; Zeeshan et al., 2020a). Ookinete cultures grown  
832 for 24 h were added to an equal volume of Matrigel (Corning), mixed thoroughly,  
833 dropped onto a slide, covered with a cover slip, and sealed with nail polish. The  
834 Matrigel was then allowed to set at 20°C for 30 min. After identifying a field  
835 containing an ookinete, time-lapse videos (one frame every 5 s for 100 cycles) were  
836 collected using the differential interference contrast settings with a 63x objective lens  
837 on a Zeiss AxioImager M2 microscope fitted with an AxioCam ICc1 digital camera  
838 and analysed with the AxioVision 4.8.2 software.

839

### 840 **Fixed immunofluorescence assay and deconvolution microscopy**

841 The ARK2-GFP gametocytes were purified, activated in ookinete medium, fixed at  
842 different time points with 4% paraformaldehyde (PFA, Sigma) diluted in MT-

843 stabilising buffer (MTSB) for 10-15 min, and added to poly-L-lysine coated slides.  
844 Immunocytochemistry was performed using primary GFP-specific rabbit monoclonal  
845 antibody (mAb) (Invitrogen-A1122; used at 1:250) and primary mouse anti- $\alpha$  tubulin  
846 mAb (Sigma-T9026; used at 1:1000). Secondary antibodies were Alexa 488  
847 conjugated anti-mouse IgG (Invitrogen-A11004) and Alexa 568 conjugated anti-  
848 rabbit IgG (Invitrogen-A11034) (used at 1 in 1000). The slides were then mounted in  
849 Vectashield 19 with DAPI (Vector Labs) for fluorescence microscopy. Parasites were  
850 visualised on a Zeiss AxioImager M2 microscope fitted with an AxioCam ICc1 digital  
851 camera. Post-acquisition analysis was carried out using Icy software – version  
852 1.9.10.0. Images presented are 2D projections of deconvoluted Z-stacks of 0.3  $\mu$ m  
853 optical sections.

854

### 855 **STED microscopy**

856 Immunofluorescence staining for STED microscopy was performed as a combination  
857 of protocols described previously (Ponjavic et al., 2021; Simon et al., 2021). Briefly,  
858 the gametocytes were fixed with 4% pre-warmed PFA/PBS. PFA was washed away  
859 thrice with PBS. Fixed cells were stored in PBS at 4°C in the dark for later  
860 immunofluorescence staining. Before beginning the immunofluorescence procedure,  
861 glass-coated 35 mm imaging  $\mu$ -dishes (Ibidi, 81156) were coated with poly-L-lysine  
862 (PLL) solution (0.01%, Sigma-Aldrich, P4832) according to the manufacturer's  
863 guidelines (0.05% final solution). After extensive washing with nuclease-free water,  
864 dishes were left to dry. The fixed cells in PBS were then seeded into PLL-coated  
865 dishes and left to settle for a day. The cells were then washed with PBS,  
866 permeabilized with 0.5% Triton X-100/PBS for 30 min at room temperature and  
867 rinsed three times with PBS. To quench free aldehyde groups, cells were incubated  
868 with freshly prepared 0.1 mg/ml NaBH<sub>4</sub>/PBS solution for 10 min. Cells were rinsed  
869 thrice with PBS and blocked with 3% BSA/PBS for 30 min. In the meantime, primary  
870 antibodies were diluted in 3% BSA/PBS and the solution was centrifuged at  
871 21,100g for 10 min at 4°C to remove potential aggregates. Cells were incubated with  
872 primary antibody to stain tubulin (mouse anti- $\alpha$ -tubulin B-5-1-2 mAb, Sigma-Aldrich,  
873 T5168, dilution 1:250) for 4 h at room temperature. Next, the cells were washed  
874 three times with 0.5% Tween-20/PBS. Incubation with secondary antibodies (donkey  
875 anti-mouse IgG Alexa Fluor 594, Abcam, ab150112; RRID: AB\_2813898, dilution  
876 1:500 or STAR ORANGE, goat anti-mouse IgG, Abberior GmbH, STORANGE-1001-  
877 500UG, dilution 1:500) in 3% BSA/PBS was performed for 1 h after removal of  
878 aggregates as described for primary antibodies. After washing twice with 0.5%  
879 Tween-20/PBS and once with PBS, cells were incubated with SiR-DNA solution  
880 (Spirochrome, SC007, 1:100) for 1h, then washed once washed with PBS and stored  
881 in PBS at 4°C in the dark until imaging.

882 Rescue-STED microscopy was performed on a single-point scanning Expert Line  
883 easy3D STED super-resolution microscope (Abberior Instruments GmbH), equipped  
884 with a pulsed 775 nm STED depletion laser and two avalanche photodiodes for  
885 detection. Super-resolution images were acquired with a 100 $\times$ 1.4 NA objective, a  
886 pixel size of 10-20 nm and a pixel dwell time of 8  $\mu$ s. The STED laser power was set

887 to 15–30%, whereas the other lasers (488, 594 and 640 nm) were adjusted to the  
888 antibody combinations used. To acquire z-stacks, a total z-stack of 3-5  $\mu\text{m}$  was  
889 acquired using a z-step size of 200-300 nm. The channel where the 640 nm laser  
890 was used for SiR-DNA excitation was taken separately in time but in the same  
891 imaging region as used for the 488 and 594 channels, and with custom-made  
892 defined emission boundaries of 594 and 640 to limit signal crosstalk between the  
893 channels. 640 and 594 nm channels were taken with STED depletion laser using the  
894 parameters described above, whereas 488 channel was taken with the same  
895 parameters but without STED depletion laser. STED images were assembled in Fiji  
896 (ImageJ-win64) as maximum intensity projections of acquired z-stacks that  
897 contained noticeable EB1 and ARK2 signals.

898

### 899 **Ultrastructure expansion microscopy (U-ExM)**

900 Purified gametocytes were activated for 1-2 minutes and then activation was stopped  
901 by adding 4% formaldehyde. Sample preparation of *P. berghei* parasites for U-ExM  
902 was performed as previously described (Bertiaux et al., 2021; Gambarotto et al.,  
903 2021), except that 4% formaldehyde (FA) was used as fixative (Rashpa and Brochet,  
904 2022). Fixed samples were then attached on a 12 mm round Poly-D-Lysine  
905 (A3890401, Gibco) coated coverslips for 10 minutes. Immuno-labelling was  
906 performed using primary antibodies against  $\alpha$ -tubulin and  $\beta$ -tubulin (1:200 dilution,  
907 AA344 and AA345 from the Geneva antibody facility), anti  $\gamma$ -tubulin antibody (1:500  
908 dilution, Sigma T5192) and anti HA antibody (3F10) (1:250 dilution, Roche).  
909 Secondary antibodies anti-guinea pig Alexa 647, anti-rabbit Alexa 405 and anti-rat  
910 Alexa 488 were used at dilutions 1:400 (Invitrogen). Atto 594 NHS-ester was used  
911 for bulk proteome labelling (Merck 08741). Images were acquired on a Leica TCS  
912 SP8 microscope, image analysis was performed using Fiji-Image J and Leica  
913 Application Suite X (LAS X) software.

### 914 **Structured illumination microscopy**

915 A small volume (3  $\mu\text{l}$ ) of gametocytes was mixed with Hoechst dye and pipetted onto  
916 2 % agarose pads (5x5 mm squares) at room temperature. After 3 min these  
917 agarose pads were placed onto glass bottom dishes with the cells facing towards  
918 glass surface (MatTek, P35G-1.5-20-C). Cells were scanned with an inverted  
919 microscope using Zeiss C-Apochromat 63x/1.2 W Korr M27 water immersion  
920 objective on a Zeiss Elyra PS.1 microscope, using the structured illumination  
921 microscopy (SIM) technique. The correction collar of the objective was set to 0.17 for  
922 optimum contrast. The following settings were used in SIM mode: lasers, 405 nm:  
923 20%, 488 nm: 50%; exposure times 100 ms (Hoechst) and 25 ms (GFP); three grid  
924 rotations, five phases. The band pass filters BP 420-480 + LP 750 and BP 495-550 +  
925 LP 750 were used for the blue and green channels, respectively. Multiple focal  
926 planes (Z stacks) were recorded with 0.2  $\mu\text{m}$  step size; later post-processing, a Z  
927 correction was done digitally on the 3D rendered images to reduce the effect of  
928 spherical aberration (reducing the elongated view in Z; a process previously tested  
929 with fluorescent beads). Images were processed and all focal planes were digitally

930 merged into a single plane (Maximum intensity projection). The images recorded in  
931 multiple focal planes (Z-stack) were 3D rendered into virtual models and exported as  
932 images and movies (see supplementary material). Processing and export of images  
933 and videos were done by Zeiss Zen 2012 Black edition, Service Pack 5 and Zeiss  
934 Zen 2.1 Blue edition.

935

### 936 **RNA isolation and quantitative Real Time PCR (qRT-PCR) analyses**

937 RNA was isolated from purified gametocytes using an RNA purification kit  
938 (Stratagene). cDNA was synthesized using an RNA-to-cDNA kit (Applied  
939 Biosystems). Gene expression was quantified from 80 ng of total RNA using SYBR  
940 green fast master mix kit (Applied Biosystems). All the primers were designed using  
941 primer3 (Primer-blast, NCBI). Analysis was conducted using an Applied Biosystems  
942 7500 fast machine with the following cycling conditions: 95°C for 20 s followed by 40  
943 cycles of 95°C for 3 s; 60°C for 30 s. Three technical replicates and three biological  
944 replicates were performed for each assayed gene. The *hsp70* (PBANKA\_081890)  
945 and *arginyl-t RNA synthetase* (PBANKA\_143420) genes were used as endogenous  
946 control reference genes. The primers used for qPCR can be found in **Table S5**.

947

### 948 **RNA-seq analysis**

949 Libraries were prepared from lyophilized total RNA, first by isolating mRNA using  
950 NEBNext Poly(A) mRNA Magnetic Isolation Module (NEB), then using NEBNext  
951 Ultra Directional RNA Library Prep Kit (NEB) according to the manufacturer's  
952 instructions. Libraries were amplified for a total of 12 PCR cycles (12 cycles of [15 s  
953 at 98°C, 30 s at 55°C, 30 s at 62°C]) using the KAPA HiFi HotStart Ready Mix  
954 (KAPA Biosystems). Libraries were sequenced using a NovaSeq 6000 DNA  
955 sequencer (Illumina), producing paired-end 100-bp reads.

956 FastQC (<https://www.bioinformatics.babraham.ac.uk/projects/fastqc/>), was  
957 used to analyse raw read quality. The first 11 bp of each read and any adapter  
958 sequences were removed using Trimmomatic  
959 (<http://www.usadellab.org/cms/?page=trimmomatic>). Bases were trimmed from reads  
960 using Sickle with a Phred quality threshold of 25 (<https://github.com/najoshi/sickle>).  
961 The resulting reads were mapped against the *P. berghei* ANKA genome (v36) using  
962 HISAT2 (version 2-2.1.0), using default parameters. Uniquely mapped, properly  
963 paired reads with mapping quality 40 or higher were retained using SAMtools  
964 (<http://samtools.sourceforge.net/>). Genome browser tracks were generated and  
965 viewed using the Integrative Genomic Viewer (IGV) (Broad Institute). Raw read  
966 counts were determined for each gene in the *P. berghei* genome using BedTools  
967 (<https://bedtools.readthedocs.io/en/latest/#>) to intersect the aligned reads with the  
968 genome annotation. Differential expression analysis was done by use of R package  
969 DESeq2 to call up- and down-regulated genes with an adjusted P-value cutoff of  
970 0.05. Gene ontology enrichment was done using R package topGO  
971 (<https://bioconductor.org/packages/release/bioc/html/topGO.html>) with the weight01  
972 algorithm.

973



## 974 **ChIP-seq analysis**

975 Gametocytes of EB1-GFP and NDC80-GFP (as a positive control) parasites were  
976 harvested, and the pellets were resuspended in 500  $\mu$ l of Hi-C lysis buffer (25 mM  
977 Tris-HCl, pH 8.0, 10 mM NaCl, 2 mM AESBF, 1% NP-40, protease inhibitors). After  
978 incubation for 10 min at room temperature (RT), the resuspended pellets were  
979 homogenized by passing through a 26.5 gauge needle/syringe 15 times and cross-  
980 linked by adding formaldehyde (1.25% final concentration) for 25 min at RT with  
981 continuous mixing. Crosslinking was stopped by adding glycine to a final  
982 concentration of 150 mM and incubating for 15 min at RT with continuous mixing.  
983 The sample was centrifuged for 5 min at 2,500 x g (~5,000 rpm) at 4°C, the pellet  
984 washed once with 500  $\mu$ l ice-cold wash buffer (50 mM Tris-HCl, pH 8.0, 50 mM  
985 NaCl, 1 mM EDTA, 2 mM AESBF, protease inhibitors) and the pellet stored at -80°C  
986 for ChIP-seq analysis. The crosslinked parasite pellets were resuspended in 1 mL of  
987 nuclear extraction buffer (10 mM HEPES, 10 mM KCl, 0.1 mM EDTA, 0.1 mM EGTA,  
988 1 mM DTT, 0.5 mM AEBSF, 1X protease inhibitor tablet), post 30 min incubation on  
989 ice, 0.25% Igepal-CA-630 was added and the sample homogenized by passing  
990 through a 26G x  $\frac{1}{2}$  needle. The nuclear pellet extracted through 5,000 rpm  
991 centrifugation, was resuspended in 130  $\mu$ l of shearing buffer (0.1% SDS, 1 mM  
992 EDTA, 10 mM Tris-HCl pH 7.5, 1X protease inhibitor tablet), and transferred to a 130  
993  $\mu$ l Covaris sonication microtube. The sample was then sonicated using a Covaris  
994 S220 Ultrasonicator for 8 min (Duty cycle: 5%, intensity peak power: 140, cycles per  
995 burst: 200, bath temperature: 6°C). The sample was transferred to ChIP dilution  
996 buffer (30 mM Tris-HCl pH 8.0, 3 mM EDTA, 0.1% SDS, 30 mM NaCl, 1.8% Triton  
997 X-100, 1X protease inhibitor tablet, 1X phosphatase inhibitor tablet) and centrifuged  
998 for 10 min at 13,000 rpm at 4°C, retaining the supernatant. For each sample, 13  $\mu$ l of  
999 protein A agarose/salmon sperm DNA beads were washed three times with 500  $\mu$ l  
1000 ChIP dilution buffer (without inhibitors) by centrifuging for 1 min at 1,000 rpm at room  
1001 temperature, then buffer was removed. For pre-clearing, the diluted chromatin  
1002 samples were added to the beads and incubated for 1 hour at 4°C with rotation, then  
1003 pelleted by centrifugation for 1 min at 1,000 rpm. Before adding antibody, ~10% of  
1004 one EB1-GFP sample was taken as input. Supernatant was removed into a LoBind  
1005 tube, carefully so as not to remove any beads, and 2  $\mu$ g of anti-GFP antibody  
1006 (Abcam ab290, anti-rabbit) were added to the sample and incubated overnight at  
1007 4°C with rotation. For one EB1-GFP sample, IgG antibody (ab37415) was added  
1008 instead as a negative control. Per sample, 25  $\mu$ l of protein A agarose/salmon sperm  
1009 DNA beads were washed with ChIP dilution buffer (no inhibitors), blocked with 1  
1010 mg/mL BSA for 1 hour at 4°C, then washed three more times with buffer. 25  $\mu$ l of  
1011 washed and blocked beads were added to the sample and incubated for 1 hour at  
1012 4°C with continuous mixing to collect the antibody/protein complex. Beads were  
1013 pelleted by centrifugation for 1 min at 1,000 rpm at 4°C. The bead/antibody/protein  
1014 complex was then washed with rotation using 1 mL of each buffers twice; low salt  
1015 immune complex wash buffer (1% SDS, 1% Triton X-100, 2 mM EDTA, 20 mM Tris-  
1016 HCl pH 8.0, 150 mM NaCl), high salt immune complex wash buffer (1% SDS, 1%  
1017 Triton X-100, 2 mM EDTA, 20 mM Tris-HCl pH 8.0, 500 mM NaCl), high salt immune

1018 complex wash buffer (1% SDS, 1% Triton X-100, 2 mM EDTA, 20 mM Tris-HCl pH  
1019 8.0, 500 mM NaCl), TE wash buffer (10 mM Tris-HCl pH 8.0, 1 mM EDTA) and  
1020 eluted from antibody by adding 250 µl of freshly prepared elution buffer (1% SDS,  
1021 0.1 M sodium bicarbonate). We added 5 M NaCl to the elution and cross-linking was  
1022 reversed by heating at 45°C overnight followed by addition of 15 µl of 20 mg/mL  
1023 RNAase A with 30 min incubation at 37°C. After this, 10 µl 0.5 M EDTA, 20 µl 1 M  
1024 Tris-HCl pH 7.5, and 2 µl 20 mg/mL proteinase K were added to the elution and  
1025 incubated for 2 hours at 45°C. DNA was recovered by phenol/chloroform extraction  
1026 and ethanol precipitation, using a phenol/chloroform/isoamyl alcohol (25:24:1)  
1027 mixture twice and chloroform once, then adding 1/10 volume of 3 M sodium acetate  
1028 pH 5.2, 2 volumes of 100% ethanol, and 1/1000 volume of 20 mg/mL glycogen.  
1029 Precipitation was allowed to occur overnight at -20°C. Samples were centrifuged at  
1030 13,000 rpm for 30 min at 4°C, then washed with fresh 80% ethanol, and centrifuged  
1031 again for 15 min with the same settings. Pellet was air-dried and resuspended in 50  
1032 µl nuclease-free water. DNA was purified using Agencourt AMPure XP beads.  
1033 Libraries were then prepared from this DNA using a KAPA library preparation kit  
1034 (KK8230) and sequenced on a NovaSeq 6000 machine. FastQC  
1035 (<https://www.bioinformatics.babraham.ac.uk/projects/fastqc/>), was used to analyze  
1036 raw read quality. Any adapter sequences were removed using Trimmomatic  
1037 (<http://www.usadellab.org/cms/?page=trimmomatic>). Bases with Phred quality scores  
1038 below 25 were trimmed using Sickle (<https://github.com/najoshi/sickle>). The resulting  
1039 reads were mapped against the *P. berghei* ANKA genome (v36) using Bowtie2  
1040 (version 2.3.4.1). Using Samtools, only properly paired reads with mapping quality  
1041 40 or higher were retained and reads marked as PCR duplicates were removed by  
1042 PicardTools MarkDuplicates (Broad Institute). Genome-wide read counts per  
1043 nucleotide were normalized by dividing millions of mapped reads for each sample  
1044 (for all samples including input) and subtracting input read counts from the ChIP and  
1045 IgG counts. From these normalized counts, genome browser tracks were generated  
1046 and viewed using the Integrative Genomic Viewer (IGV).

1047

#### 1048 **Statistical analysis**

1049 All statistical analyses were performed using GraphPad Prism 7 (GraphPad  
1050 Software). For qRT-PCR, a two-way ANOVA test was used to examine significant  
1051 differences between wild-type and mutant strains.

1052

1053 **Data Availability.** DNA Sequence reads have been deposited in the NCBI  
1054 Sequence Read Archive with accession number: PRJNA808974

1055

1056 **Acknowledgments.** We wish to thank Julie Rodgers for helping to maintain the  
1057 insectary and other technical works and Cleidiane Zampronio at University Warwick  
1058 for mass mass spectrometry methods,

1059

#### 1060 **Funding**

1061 This work was supported by: MRC UK (G0900109, G0900278, MR/K011782/1) to  
1062 RT and BBSRC (BB/N017609/1) and ERC advance grant funded by UKRI Frontier  
1063 Science (EP/X024776/1) to RT and MZ; The Francis Crick Institute (FC001097),  
1064 which receives its core funding from Cancer Research UK (FC001097), the UK  
1065 Medical Research Council (FC001097), and the Wellcome Trust (FC001097) to  
1066 AAH; the NIH/NIAID (R01 AI136511) and the University of California, Riverside  
1067 (NIFA-Hatch-225935) to KGLR; ET is supported by a personal fellowship from the  
1068 Nederlandse Organisatie voor Wetenschappelijk Onderzoek, the Netherlands (grant  
1069 no. VI.Veni.202.223). Swiss National Science Foundation (31003A\_179321 and  
1070 310030\_208151) to MB. IMT and KV acknowledge support by the European  
1071 Research Council (ERC Synergy Grant, GA Number 855158, granted to IMT), and  
1072 projects co-financed by the Croatian Government and European Union through the  
1073 European Regional Development Fund—the Competitiveness and Cohesion  
1074 Operational Program: IPSted (grant KK.01.1.1.04.0057) and QuantiXLie Center of  
1075 Excellence (grant KK.01.1.1.01.0004). AE was supported by a Commonwealth  
1076 Academic Fellowship awarded by the Commonwealth Scholarship Commission in  
1077 the UK. For Open Access, the author has applied a CC BY public copyright licence  
1078 to any Author Accepted Manuscript version arising from this submission.  
1079

1080 **Figures**

1081

1082 **Fig 1. Comparative analysis of Aurora kinase family evolution reveals highly**  
1083 **diverged paralogues amongst the Apicomplexa. (A)** Overview of five locations of  
1084 Aurora kinases (AKs) during the process of chromosome segregation in a canonical  
1085 mitotic cell progression in late anaphase. Colours for each subcellular location are  
1086 also used in panels B and C. **(B)** Presence-absence matrix of eukaryote mitotic  
1087 kinases focused on Apicomplexa and AKs, including the scaffolds and activators of  
1088 this essential kinase family. Right: (un)known mitotic location and complexes of  
1089 Aurora paralogs in subgroups exemplified by model systems. LECA is last eukaryotic  
1090 common ancestor **(C)** Recurrent duplication and sub-functionalisation of the AK  
1091 family in model organisms throughout the eukaryotic tree of life. Left: the  
1092 phylogenetic relationships of aurora paralogs. Light and dark grey boxes indicate the  
1093 Aurora subtype: polar (p) or equatorial (e). I and II indicate points of recurrent  
1094 duplication in the Aurora family. Middle: (un)known subcellular location of each  
1095 Aurora paralog; colours correspond to those of panel A. Right: AK domain topology;  
1096 note the extended length of Aurora paralogs ARK2 and ARK3 in Apicomplexa. Right  
1097 bottom: AlphaFold2-predicted structure of *P. falciparum* ARK2  
1098 (<https://alphafold.ebi.ac.uk/entry/O77328>).

1099

1100 **Fig 2. Real time live-cell imaging of PbARK2 reveals spindle association and**  
1101 **kinetochore dynamics during male gametogony.**

1102 The upper schematic shows the major stages of male gametogony with subcellular  
1103 structures identified. (A) Imaging of ARK2-GFP (green) during male gametogony  
1104 reveals an initial location at the putative microtubule organizing centre (MTOC) just  
1105 after activation (1 minute post activation; mpa), and at the spindles and spindle poles  
1106 in later stages. The protein accumulates diffusely in the residual nuclear body after  
1107 gamete formation and is not present in the flagellate gametes (15 mpa). Scale bar =  
1108 5  $\mu\text{m}$ . (B) Still images (5 sec intervals) showing development of an ARK2-GFP  
1109 bridge from one focal point followed by further division into two halves within 1 to 2  
1110 mpa. Scale bar = 5  $\mu\text{m}$ . (C) The location of ARK2-mCherry (red) relative to  
1111 kinetochore marker, NDC80-GFP (green). Scale bar = 5  $\mu\text{m}$ . (D) Still images (5 s  
1112 intervals) of the dynamic location of ARK2-mCherry and NDC80-GFP between 1 and  
1113 2 min of activation. Scale bar = 5  $\mu\text{m}$ . (E) The relative location of ARK2-GFP (green)  
1114 and the basal body and axoneme marker, kinesin-8B-mCherry (red). Scale bar = 5  
1115  $\mu\text{m}$ . (F) Still images (5 s intervals) of the dynamic location ARK2-GFP and kinesin-  
1116 8B-mCherry between 2 and 3 min of activation. Scale bar = 5  $\mu\text{m}$ . (G) Indirect  
1117 immunofluorescence followed by STED confocal microscopy showing co-localization  
1118 of ARK2 (purple) and  $\alpha$ -tubulin (green) at spindle but not at cytoplasmic microtubules  
1119 at 1 mpa. Scale bar = 1  $\mu\text{m}$ . (H) Expansion microscopy showing co-localization of  
1120 ARK2 (yellow) and  $\alpha/\beta$  tubulin (purple) staining at spindle but not at cytoplasmic  
1121 microtubules at 1 mpa. Scale bar = 1  $\mu\text{m}$ . (I) 3D-SIM image showing locations of

1122 ARK2 (purple) and NDC80 (green) at 1 mpa. Scale bar = 1  $\mu$ m. DNA (blue) is  
1123 stained with Hoechst in panels A to F and with DAPI in panel G.

1124 **Fig 3. *Pb*ARK2 localizes to a putative MTOC and spindle during ookinete**  
1125 **development** The schematic depicts ookinete differentiation from the zygote through  
1126 six stages over a 24-hour period. The genome is initially diploid (2N) and then  
1127 replicated (4N) just before the nucleus migrates into the growing apical  
1128 protuberance. **(A)** Live-cell imaging showing ARK2-GFP (green) location during  
1129 ookinete development, relative to the nuclear DNA (blue, Hoechst), and cy3-  
1130 conjugated 13.1 antibody (red), which recognises P28 protein on the surface of  
1131 zygotes and ookinetes. DIC images are shown in the bottom set of panels. Scale bar  
1132 = 5  $\mu$ m. **(B)** The location of ARK2–cherry (red) in relation to the kinetochore marker,  
1133 Ndc80-GFP (green) and the nuclear DNA (blue) at different stages of ookinete  
1134 development. Scale bar = 5  $\mu$ m.

1135

1136 **Fig 4. Conditional knockdown of *Pb*ARK2 identifies an essential role in oocyst**  
1137 **development and sporogony.** (A) The number of exflagellation centres per field of  
1138  $P_{\text{clag-ark2}}$  (black bar) compared with WT-GFP (white bar) parasites at the end of  
1139 male gametogony. Shown is mean  $\pm$  SD; n = 3 independent experiments. (B)  
1140 Percentage ookinete conversion for  $P_{\text{clag-ark2}}$  (black bar) and WT-GFP (white bar)  
1141 parasites. Ookinetes were identified by reactivity with 13.1 antibody and successful  
1142 differentiation into elongated ‘banana shaped’ ookinetes. Shown is mean  $\pm$  SD; n = 3  
1143 independent experiments. (C) Total number of GFP-positive oocysts per infected  
1144 mosquito in  $P_{\text{clag-ark2}}$  (black bar) and WT-GFP (white bar) parasites at 7, 14 and 21-  
1145 day post-infection (dpi). Shown is mean  $\pm$  SD; n = 3 independent experiments (with  
1146 >15 mosquitoes for each) \*\*\*p<0.001. (D) Mid guts at 10x- and 63x-magnification  
1147 showing fluorescent oocysts of  $P_{\text{clag-ark2}}$  and WT-GFP lines at 7, 14 and 21 dpi.  
1148 Scale bar = 50  $\mu$ m (10x) or 20  $\mu$ m (63x). (E) Oocyst sizes of  $P_{\text{clag-ark2}}$  and WT-GFP  
1149 lines at 7, 14 and 21 dpi. (F) Total sporozoite number in salivary glands of  $P_{\text{clag-ark2}}$   
1150 (black bar, not visible) and WT-GFP (white bar) parasites, showing mean  $\pm$  SD; n = 3  
1151 independent experiments (G) Rescue experiment showing male-derived allele of  
1152  $P_{\text{clag-ark2}}$  is affected and is complemented by ‘female’  $\Delta$ dozi. (H) RNA-seq analysis  
1153 showing upregulated and downregulated genes in  $P_{\text{clag-ark2}}$  parasites compared to  
1154 WT-GFP parasites (I) Expression level validation of relevant selected genes from the  
1155 RNAseq data using qRT-PCR. Shown is mean  $\pm$  SD; n = 3 independent  
1156 experiments.

1157

1158 **Fig 5. *Pb*ARK2-GFP interactome during male gametogony**

1159 (A) Workflow for immunoprecipitation experiment using GFP-trap beads and  
1160 gametocyte crosslinked lysates, trypsin digestion and mass spectrometry analysis to  
1161 identify ARK2-GFP interacting partners. (B) Projection of the first two components of  
1162 a principal component analysis (PCA) of unique peptides derived from ARK2-GFP or  
1163 GFP-alone immunoprecipitations with GFP-trap (raw data: Table S2). A subset of  
1164 proteins is highlighted on the map based on relevant functional categories.

1165

1166 **Fig 6. EB1 like ARK2 associates with spindle and kinetochore during male**  
1167 **gametogony.** (A) Live cell imaging of EB1-GFP (green) showing its location on  
1168 spindles and spindle poles. DNA is stained with Hoechst dye (blue); scale bar = 5  
1169  $\mu\text{m}$ . (B) ChIP-seq analysis of EB1-GFP profiles for all 14 chromosomes showing its  
1170 centromeric binding. Signals are plotted on a normalized read per million (RPM)  
1171 basis. Red lines at the top indicate the ends of chromosomes; circles on the bottom  
1172 indicate centromere locations. NDC80-GFP was used as a positive control and IgG  
1173 was used as a negative control. (C) Live cell imaging showing the location of EB1-  
1174 GFP (green) and kinetochore marker NDC80-mCherry (red) in a gametocyte  
1175 activated for 1-2 min. DNA is stained with Hoechst dye (blue); scale bar = 5  $\mu\text{m}$ . (D)  
1176 Live cell imaging showing the location of EB1-GFP (green) and ARK2-mCherry (red)  
1177 in a gametocyte activated for 1-2 min. DNA is stained with Hoechst dye (blue); scale  
1178 bar = 5  $\mu\text{m}$ . (E) Live cell imaging showing the location of EB1-mCherry (red) and  
1179 basal body marker SAS4-GFP (green) in gametocytes activated for 1 to 2 min (upper  
1180 panel) and 4 min (lower panel). DNA is stained with Hoechst dye (blue); scale bar =  
1181 5  $\mu\text{m}$ . (F) 3D-SIM image showing location of EB1 (green) and NDC80 (purple) in  
1182 gametocyte activated for 1 min. DNA is stained with Hoechst dye (blue); scale bar =  
1183 1  $\mu\text{m}$ . (G) 3D-SIM image showing location of EB1 (green) and ARK2 (purple) in  
1184 gametocyte activated for 3 to 4 min. DNA is stained with Hoechst dye (blue); scale  
1185 bar = 1  $\mu\text{m}$ . (H) 3D-SIM image showing location of EB1 (purple) and cytoplasmic  
1186 SAS4 (green) in gametocyte activated for 1 min. DNA is stained with Hoechst dye  
1187 (blue); scale bar = 1  $\mu\text{m}$ . (I) STED confocal microscopy showing co-localization of  
1188 EB1 (purple) and  $\alpha$ -tubulin (green) at spindle but not with cytoplasmic microtubules  
1189 in gametocytes activated for 1 min. DNA is stained with SiR DNA (blue); scale bar =  
1190 1  $\mu\text{m}$ .

1191

1192 **Fig 7. Deletion of *Pbeb1* identifies an essential role in oocyst development and**  
1193 **sporogony.** (A) The number of exflagellation centres per field of  $\Delta eb1$  (black bar)  
1194 compared with WT-GFP (white bar) parasites at the end of male gametogony.  
1195 Shown is mean  $\pm$  SD n = 3 independent experiments. (B) Percentage ookinete  
1196 conversion for  $\Delta eb1$  (black bar) and WT-GFP (white bar) parasites. Ookinetes were  
1197 identified by reactivity with 13.1 antibody and successful differentiation into  
1198 elongated 'banana shaped' ookinetes. Shown is mean  $\pm$  SD; n = 3 independent  
1199 experiments. (C) Total number of GFP positive oocysts per infected mosquito in  
1200  $\Delta eb1$  (black bar) and WT-GFP (white bar) parasites at 10- and 21-days post-  
1201 infection (dpi). Shown is mean  $\pm$  SD; n = 3 independent experiments (with >15  
1202 mosquitoes for each) \*\*p<0.01. (D) Mid guts at 10x- and 63x- magnification showing  
1203 fluorescent oocysts of  $\Delta eb1$  and WT-GFP lines at 10 and 21 dpi. Scale bar = 50  $\mu\text{m}$   
1204 (10x) or 20  $\mu\text{m}$  (63x). (E) RNA-seq analysis showing depletion of EB1 transcript in  
1205  $\Delta eb1$  gametocytes at 0- and 30 min post activation. (F) Scatter plot showing up- and  
1206 downregulated genes in  $\Delta eb1$  compared to WT-GFP gametocytes.

1207

1208 **Fig 8. EB1 and ARK2 form part of a protein axis at the spindle during male**  
1209 **gametogony.** (A) Projection of the first two components of a principal component

1210 analysis (PCA) of unique peptides identified by mass spectrometry from EB1-GFP or  
1211 GFP-alone control immunoprecipitates. **(B)** Projection of the first two components of  
1212 a PCA of unique peptides identified by mass spectrometry from ARK2-GFP, EB1-  
1213 GFP and GFP-alone immunoprecipitates. Clusters of proteins identified indicate  
1214 physical and/or functional association, e.g. the MCM (helicase), RFC (replication  
1215 factor C), condensin (SMC2/4), cohesion (SMC1/3), ORC (Origin of Recognition  
1216 Complex), parts of the kinetochore and the EB1-ARK2-related putative protein  
1217 complex (black circle). **(C)** Schematic that reconciles the ARK2 location relative to  
1218 that of other relevant proteins present at the spindle (pole) during male gametogony.  
1219 Proteins are grouped by cellular structure/complexes (see legend in panel A). A  
1220 dashed line indicates proteins that appear enriched in ARK2 and EB1 pulldowns.  
1221 Bottom: table with numbers of unique peptides in LC-MS/MS analysis of ARK2-GFP  
1222 and EB1-GFP immunoprecipitates. **(D)** Location of different mitotic proteins during  
1223 male gametogony. Shown are two phases of mitosis: a metaphase-like state (left  
1224 top) with kinetochores populating the full length of the spindle, and late anaphase  
1225 (right bottom).  
1226  
1227

1228 **SUPPLEMENTARY DATA**

1229 **Supplementary figures**

1230

1231 **Fig S1. Generation of PbARK2-GFP parasites and analysis of subcellular**  
1232 **location of ARK2-GFP throughout the life cycle**

1233 **(A)** Schematic representation of the endogenous *Pbark2* locus, the GFP-tagging  
1234 construct and the recombined *ark2* locus following single homologous  
1235 recombination. Arrows 1 and 2 indicate the position of PCR primers used to confirm  
1236 successful integration of the construct. **(B)** Diagnostic PCR of *ark2* and WT parasites  
1237 using primers IntT204 (Arrow 1) and ol492 (Arrow 2). Integration of the *ark2* tagging  
1238 construct gives a band of 594 bp. Tag = ARK2-GFP parasite line. **(C)** Live cell  
1239 imaging of ARK2-GFP parasites during erythrocytic schizogony showing one or two  
1240 focal points of ARK2-GFP (green) per nucleus. DNA is stained with Hoechst dye  
1241 (blue); scale bar = 5  $\mu$ m. **(D)** Live cell imaging of ARK2-GFP parasites during oocyst  
1242 development in mosquitoes showing discrete foci of ARK2-GFP. DNA is stained with  
1243 Hoechst dye (blue); scale bar = 5  $\mu$ m. **(E)** Live cell imaging showing ARK2-GFP  
1244 gametocytes at 30 sec and 15 min after activation. ARK2-GFP was not detected in  
1245 free gametes (15 min gametocytes). DNA is stained with Hoechst dye (blue); scale  
1246 bar = 5  $\mu$ m. **(F)** Live-cell imaging showing ARK2-GFP location in zygote and  
1247 ookinete. A cy3-conjugated antibody, 13.1, which recognises the protein P28 on the  
1248 surface of zygotes and ookinetes was used to mark these stages (red). DNA is  
1249 stained with Hoechst dye (blue); scale bar = 5  $\mu$ m. **(G)** Still images (at every 5 s)  
1250 showing dynamic location of ARK2-GFP in gametocytes within 3 to 4 min post  
1251 activation (mpa) during male gametogony. DNA is stained with Hoechst dye (blue);  
1252 scale bar = 5  $\mu$ m. **(H)** Still images (at every 5 s) showing dynamic location of ARK2-  
1253 GFP within 6 to 7 mpa during male gametogony. DNA is stained with Hoechst dye  
1254 (blue); scale bar = 5  $\mu$ m.

1255

1256 **Fig S2. Quantification and staining with tubulin antibody of events of ARK2**  
1257 **localization during male gametogony.**

1258 **A.** The events of ARK2-GFP localization during different time points after  
1259 gametocytes activation. **(B)** Immunofluorescence assay (IFA) showing location of  
1260 ARK2 (green) and  $\alpha$ -tubulin (red) in male gametocytes at different time points after  
1261 activation. DNA is stained with DAPI (blue); mpa = min post activation; scale bar = 5  
1262  $\mu$ m. **(C)** Deconvoluted images improve the resolution of ARK2 and show its  
1263 colocalization with spindle microtubules. Scale bar = 5  $\mu$ m.

1264

1265 **Fig S3. The location of ARK2 and various subcellular markers**

1266 **(A)** The location of ARK2-mCherry (red) and the kinetochore marker, NDC80-GFP  
1267 (green) during male gametogony. DNA is stained with Hoechst dye (blue); scale bar  
1268 = 5  $\mu$ m. **(B)** Still images (at every 5 s) showing dynamic location of ARK2-mCherry  
1269 and NDC80-GFP in gametocytes activated for 2 to 3 min. DNA is stained with  
1270 Hoechst dye (blue); scale bar = 5  $\mu$ m. **(C)** The location of ARK2-GFP (green) and the  
1271 basal body and axoneme marker, kinesin-8B-mCherry (red) during male



1272 gametogony. DNA is stained with Hoechst dye (blue); scale bar = 5  $\mu$ m. **(D)** Still  
1273 images (at every 5 s) showing dynamic location of ARK2-GFP and kinesin-8B-  
1274 mCherry in gametocytes activated for 4 to 5 min. DNA is stained with Hoechst dye  
1275 (blue); scale bar = 5  $\mu$ m.

1276

#### 1277 **Fig S4. ARK2 associates with spindle microtubules.**

1278 **(A)** STED confocal microscopy showing co-localization of ARK2 (purple) and  $\alpha$ -  
1279 tubulin (green) at spindle but not with cytoplasmic microtubules in gametocytes  
1280 activated for 2 min. DNA is stained with SiR DNA (blue); scale bar = 1  $\mu$ m. **(B)**  
1281 Expansion microscopy showing co-localization of ARK2 (yellow) and  $\alpha/\beta$  tubulin  
1282 (purple) staining at spindle but not at cytoplasmic microtubules at 2 mpa. Scale bar =  
1283 1  $\mu$ m. **(C)** 3D-SIM image showing locations of ARK2 (purple) and NDC80 (green) at  
1284 2 mpa. Scale bar = 1  $\mu$ m. DNA (blue) is stained with DAPI.

1285

#### 1286 **Fig S5. Generation and genotypic analysis of *PbARK2-AID/HA* and *P<sub>clag</sub>-ark2*** 1287 **parasites.**

1288 **(A)** Schematic representation of auxin inducible degron (AID) strategy to generate  
1289 *ARK2-AID/HA* parasites. **(B)**. Integration PCR of the ARK2-AID/HA construct in the  
1290 *ark2* locus. Oligonucleotides used for PCR genotyping are indicated, and agarose  
1291 gels to analyse the corresponding PCR products from genotyping reactions are  
1292 shown. **(C)** ARK2-AID/HA protein expression level as measured by western blotting  
1293 upon addition of auxin to mature purified gametocytes;  $\alpha$ -tubulin served as a loading  
1294 control. **(D)** Male gametogony (Exflagellation rate) of ARK2-AID/HA as measured  
1295 upon addition of auxin and without auxin to mature purified gametocytes. **(E)**  
1296 Schematic representation of the promoter swap strategy to construct *P<sub>clag</sub>-ark2*  
1297 parasites (placing ARK2 under the control of the clag promoter) by double  
1298 homologous recombination. Arrows 1 and 2 indicate the primer positions used to  
1299 confirm 5' integration and arrows 3 and 4 indicate the primers used to confirm 3'  
1300 integration **(F)** Integration PCR of the promoter swap construct into the *ARK2* locus.  
1301 Primer 1 (IntPTD245) and primer 2 (5'-IntPTD) were used to confirm successful  
1302 integration of the selectable marker, resulting in a band of 460 bp. Primer 3 (3'-  
1303 intPTclag) and primer 4 (IntPTD243) were used to determine the successful  
1304 integration of the clag promoter, resulting in a band of 571 bp. Primer 1 (IntPTD245)  
1305 and primer 4 (IntPTD243) were used to confirm a complete knock-in of the construct  
1306 with a band at 4.5 kb and the absence of a band at 2.1 kb. **(G)** qRT-PCR showing  
1307 normalised expression of ARK2 transcripts in *P<sub>clag</sub>-ark2* and WT-GFP parasites.

1308

#### 1309 **Fig S6. Analysis of ookinete motility of *P<sub>clag</sub>-ark2* and WT-GFP parasites**

1310 **(A)** Representative frames from time-lapse videos of WT-GFP and *P<sub>clag</sub>-ark2*  
1311 ookinetes in matrigel. Red arrow indicates the apical end of the ookinetes. Bar  $\square$ =  
1312  $\square$ 5  $\mu$ m. **(B)** Graph shows the quantitative data for WT-GFP and *P<sub>clag</sub>-ark2* ookinete  
1313 motility. (Error bar  $\pm$  SD; n=3 independent experiments; >20 ookinetes were  
1314 analysed for each experiment). **(C)** RNA sequence analysis showing downregulated

1315 transcript of ARK2 in *Pclag-ark2* parasites. **(D)** Gene ontology enrichment analysis  
1316 showing the most affected genes involved in various biological processes.

1317

1318 **Fig S7. Generation of PbEB1-GFP parasites and analysis of PbEB1-GFP**  
1319 **location during gametogony**

1320 **(A)** Schematic representation of the endogenous *Pbeb1* locus, the GFP-tagging  
1321 construct and the recombined *eb1* locus following single homologous recombination.  
1322 Arrows 1 and 2 indicate the position of PCR primers used to confirm successful  
1323 integration of the construct. **(B)** Diagnostic PCR of *eb1* and WT parasites using  
1324 primers IntT264 (Arrow 1) and ol492 (Arrow 2). Integration of the EB1 tagging  
1325 construct gives a band of 1267 bp. Tag = EB1-GFP parasite line. **(C)** Still images (at  
1326 every 5 s) showing dynamic location of EB1-GFP in activated gametocytes at 1-2  
1327 min during male gametogony. DNA is stained with Hoechst dye (blue); scale bar = 5  
1328  $\mu\text{m}$ . **(D)** Still images (at every 5 s) showing dynamic location of EB1-GFP in activated  
1329 gametocytes at 2 to 3 mpa. DNA is stained with Hoechst dye (blue); Scale bar = 5  
1330  $\mu\text{m}$ . **(E)** Still images (at every 5 s) showing dynamic location of EB1-GFP in activated  
1331 gametocytes at 4 to 6 mpa. DNA is stained with Hoechst dye (blue); scale bar = 5  
1332  $\mu\text{m}$ . **(F)** The location of EB1-GFP (green) and the kinetochore marker, NDC80-  
1333 mCherry (red) during male gametogony. DNA is stained with Hoechst dye (blue);  
1334 scale bar = 5  $\mu\text{m}$ .

1335

1336 **Fig S8. EB1 associates with spindle microtubules.**

1337 **(A)** 3D-SIM image showing location of EB1 (green) with NDC80 (purple) in  
1338 gametocyte activated for 2 min and EB1 (green) with ARK2 (purple) in gametocytes  
1339 activated for 4 min. 3D-SIM images showing location of EB1 (purple) and  
1340 cytoplasmic SAS4 (green) in gametocyte activated for 2 min. DNA is stained with  
1341 Hoechst dye (blue); scale bar = 1  $\mu\text{m}$ . **(B)** STED confocal microscopy showing co-  
1342 localization of EB1 (purple) and  $\alpha$ -tubulin (green) at spindle but not with cytoplasmic  
1343 microtubules in gametocytes activated for 2 min. DNA is stained with SiR DNA  
1344 (blue); scale bar = 1  $\mu\text{m}$ .

1345

1346 **Fig S9. PbEB1-GFP is located at the apical end of the parasite and at the**  
1347 **putative MTOC and spindle like PbARK2-GFP during ookinete development**

1348 Live-cell imaging shows that EB1-GFP is located at the microtubule organising  
1349 centre (MTOC) and spindles in the nucleus during ookinete development and then  
1350 disappears in mature ookinetes (24 h). It is also located at the apical end of the  
1351 growing protuberance during zygote to ookinete transition. A cy3-conjugated  
1352 antibody, 13.1, which recognises the protein P28 on the surface of zygotes and  
1353 ookinetes was used to mark these stages (red). Scale bar = 5  $\mu\text{m}$ .

1354

1355 **Fig S10. Generation and genotypic analysis of  $\Delta eb1$  parasites**

1356 **(A)** Schematic representation of the endogenous *eb1* locus, the targeting knockout  
1357 construct and the recombined *eb1* locus following double homologous crossover  
1358 recombination. Arrows 1 and 2 indicate PCR primers used to confirm successful

1359 integration in the *eb1* locus following recombination, and arrows 3 and 4 indicate  
1360 PCR primers used to show deletion of the *eb1* gene. **(B)** Integration PCR of the *eb1*  
1361 locus in WTGFP (WT) and knockout (Mut) parasites using primers: integration primer  
1362 and ol248. Integration of the targeting construct gives band of expected size for each  
1363 gene. **(C)** Gene ontology enrichment of upregulated genes in global transcriptomic  
1364 analysis of  $\Delta eb1$  gametocytes activated for 30 min, showing where the most affected  
1365 genes are involved in various biological processes.

1366

### 1367 **Supplementary tables**

1368 **Table S1.** Overview of genomes and sequences used for generating Figure 1B.

1369 **Table S2.** List of genes differentially expressed between *P<sub>clag-ark2</sub>* and WT-GFP  
1370 gametocytes activated for 30 min.

1371 **Table S3.** Spreadsheet (excel) file with unique peptide values for GFP-trap  
1372 immunoprecipitate for gametocytes 1 minute after activation for WT-GFP, ARK2-  
1373 GFP and EB1-GFP parasites. NAs are set to zero (0). Specific protein groups that  
1374 belong to a similar functional class (e.g. replication machinery, kinetochore etc) are  
1375 colour coded according to the scheme visualised in Fig 5B and Fig 8. Five parts of  
1376 the table are present: (1) gene details I; containing gene name, manual annotations,  
1377 amino acid number (AA) and molecular weight (MW), (2) correlations; Pearson (p)  
1378 and Spearman (s, rank) correlation values for ARK2 and EB1, (3) PCA, principal  
1379 components, (4) unique peptide values; NA is -, and \* indicates that single peptide  
1380 calls are to be approached with suspicion (minimal of 2 is usual cut-off), (5) gene  
1381 details II; for GO terms and OG definitions that can be found at PlasmoDB  
1382 (<https://plasmodb.org/>).

1383 **Table S4.** List of genes differentially expressed between  $\Delta eb1$  and WT-GFP  
1384 gametocytes activated for 30 min

1385 **Table S5.** Oligonucleotides used in this study.

1386

### 1387 **Supplementary Movies**

1388 **Video S1.** Time lapse video showing ARK2-GFP focal point extending to form a  
1389 bridge-like spindle and breaking into two halves in gametocytes 1 to 2 min after  
1390 activation. Still images used in Fig 2B.

1391 **Video S2.** Time lapse video showing two ARK2-GFP bridge-like spindles breaking  
1392 and producing four focal points in gametocytes 3 to 4 min after activation. Still  
1393 images used in Fig S1G.

1394 **Video S3.** Time lapse video showing four ARK2-GFP bridge-like spindles breaking  
1395 and producing eight focal points in gametocytes 6 to 8 min after activation. Still  
1396 images used in Fig S1H.

1397 **Video S4.** Time lapse video showing ARK2-mCherry and NDC80-GFP dynamics in  
1398 gametocytes activated for 1 to 2 min. Still images used in Fig 2D.

1399 **Video S5.** Time lapse video showing ARK2-mCherry and NDC80-GFP dynamics in  
1400 gametocytes activated for 2 to 3 min. Still images used in Fig S2D.

1401 **Video S6.** Time lapse video showing ARK2-GFP and kinesin-8B-mCherry dynamics  
1402 in activated gametocytes for 2-3 min. Still images used in Fig 2F.

1403 **Video S7.** Time lapse video showing ARK2-GFP and kinesin-8B-mCherry dynamics  
1404 in gametocytes activated for 4 to 6 min. Still images used in Fig S2F.  
1405 **Video S8.** Gliding motility of *Pclag-ark2* ookinetes. Still images used in Fig S4A  
1406 **Video S9.** Gliding motility of *WT-GFP* ookinetes. Still images used in Fig S4A  
1407 **Video S10.** Time lapse video showing EB1-GFP focal point extending to form a  
1408 bridge like spindle in activated gametocytes for 1-2 min. Still images used in Fig  
1409 S5C.  
1410 **Video S11.** Time lapse video showing EB1-GFP bridge breaking into two halves and  
1411 accumulating at two focal points in a gametocyte activated for 2 to 3 min. Still images  
1412 used in Fig S5D.  
1413 **Video S12.** Time lapse video showing two bridges of EB1-GFP breaking into four  
1414 halves and accumulating at four focal points in a gametocyte activated for 2 to 3 min.  
1415 Still images used in Fig S5E.

1416

## 1417 **References**

1418

- 1419 Akiyoshi, B. 2020. Analysis of a Mad2 homolog in *Trypanosoma brucei* provides  
1420 possible hints on the origin of the spindle checkpoint. *bioRxiv*.  
1421 Avo Santos, M., C. van de Werken, M. de Vries, H. Jahr, M.J. Vromans, J.S. Laven,  
1422 B.C. Fauser, G.J. Kops, S.M. Lens, and E.B. Baart. 2011. A role for Aurora C  
1423 in the chromosomal passenger complex during human preimplantation  
1424 embryo development. *Hum Reprod.* 26:1868-1881.  
1425 Balestra, A.C., M. Zeeshan, E. Rea, C. Pasquarello, L. Brusini, T. Mourier, A.K.  
1426 Subudhi, N. Klages, P. Arboit, R. Pandey, D. Brady, S. Vaughan, A.A. Holder,  
1427 A. Pain, D.J. Ferguson, A. Hainard, R. Tewari, and M. Brochet. 2020. A  
1428 divergent cyclin/cyclin-dependent kinase complex controls the atypical  
1429 replication of a malaria parasite during gametogony and transmission. *Elife.* 9.  
1430 Banerjee, B., C.A. Kestner, and P.T. Stukenberg. 2014. EB1 enables spindle  
1431 microtubules to regulate centromeric recruitment of Aurora B. *J Cell Biol.*  
1432 204:947-963.  
1433 Beetsma, A.L., T.J. van de Wiel, R.W. Sauerwein, and W.M. Eling. 1998.  
1434 *Plasmodium berghei* ANKA: purification of large numbers of infectious  
1435 gametocytes. *Exp Parasitol.* 88:69-72.  
1436 Berry, L., C.T. Chen, M.E. Francia, A. Guerin, A. Graindorge, J.M. Saliou, M.  
1437 Grandmougin, S. Wein, C. Bechara, J. Morlon-Guyot, Y. Bordat, M.J.  
1438 Gubbels, M. Lebrun, J.F. Dubremetz, and W. Daher. 2018. *Toxoplasma*  
1439 *gondii* chromosomal passenger complex is essential for the organization of a  
1440 functional mitotic spindle: a prerequisite for productive endodyogeny. *Cell Mol*  
1441 *Life Sci.* 75:4417-4443.  
1442 Berry, L., C.T. Chen, L. Reininger, T.G. Carvalho, H. El Hajj, J. Morlon-Guyot, Y.  
1443 Bordat, M. Lebrun, M.J. Gubbels, C. Doerig, and W. Daher. 2016. The  
1444 conserved apicomplexan Aurora kinase TgArk3 is involved in endodyogeny,  
1445 duplication rate and parasite virulence. *Cell Microbiol.* 18:1106-1120.  
1446 Bertiaux, E., A.C. Balestra, L. Bournonville, V. Louvel, B. Maco, D. Soldati-Favre, M.  
1447 Brochet, P. Guichard, and V. Hamel. 2021. Expansion microscopy provides  
1448 new insights into the cytoskeleton of malaria parasites including the  
1449 conservation of a conoid. *PLoS Biol.* 19:e3001020.

- 1450 Brusini, L., N. Dos Santos Pacheco, E.C. Tromer, D. Soldati-Favre, and M. Brochet.  
1451 2022. Composition and organization of kinetochores show plasticity in  
1452 apicomplexan chromosome segregation. *J Cell Biol.* 221.
- 1453 Bushell, E., A.R. Gomes, T. Sanderson, B. Anar, G. Girling, C. Herd, T. Metcalf, K.  
1454 Modrzynska, F. Schwach, R.E. Martin, M.W. Mather, G.I. McFadden, L. Parts,  
1455 G.G. Rutledge, A.B. Vaidya, K. Wengelnik, J.C. Rayner, and O. Billker. 2017.  
1456 Functional Profiling of a Plasmodium Genome Reveals an Abundance of  
1457 Essential Genes. *Cell.* 170:260-272 e268.
- 1458 Bushell, E.S., A. Ecker, T. Schlegelmilch, D. Goulding, G. Dougan, R.E. Sinden,  
1459 G.K. Christophides, F.C. Kafatos, and D. Vlachou. 2009. Paternal effect of the  
1460 nuclear formin-like protein MISFIT on Plasmodium development in the  
1461 mosquito vector. *PLoS Pathog.* 5:e1000539.
- 1462 Buvelot, S., S.Y. Tatsutani, D. Vermaak, and S. Biggins. 2003. The budding yeast  
1463 Ipl1/Aurora protein kinase regulates mitotic spindle disassembly. *J Cell Biol.*  
1464 160:329-339.
- 1465 Carmena, M., and W.C. Earnshaw. 2003. The cellular geography of aurora kinases.  
1466 *Nat Rev Mol Cell Biol.* 4:842-854.
- 1467 Carmena, M., W.C. Earnshaw, and D.M. Glover. 2015. The Dawn of Aurora Kinase  
1468 Research: From Fly Genetics to the Clinic. *Front Cell Dev Biol.* 3:73.
- 1469 Carmena, M., S. Ruchaud, and W.C. Earnshaw. 2009. Making the Auroras glow:  
1470 regulation of Aurora A and B kinase function by interacting proteins. *Curr Opin*  
1471 *Cell Biol.* 21:796-805.
- 1472 Chen, C.T., M. Kelly, J. Leon, B. Nwagbara, P. Ebbert, D.J. Ferguson, L.A. Lowery,  
1473 N. Morrissette, and M.J. Gubbels. 2015. Compartmentalized Toxoplasma EB1  
1474 bundles spindle microtubules to secure accurate chromosome segregation.  
1475 *Mol Biol Cell.* 26:4562-4576.
- 1476 Davids, B.J., S. Williams, T. Lauwaet, T. Palanca, and F.D. Gillin. 2008. Giardia  
1477 lamblia aurora kinase: a regulator of mitosis in a binucleate parasite. *Int J*  
1478 *Parasitol.* 38:353-369.
- 1479 Drechsler, H., and A.D. McAinsh. 2012. Exotic mitotic mechanisms. *Open Biol.*  
1480 2:120140.
- 1481 Fassolari, M., and G.D. Alonso. 2019. Aurora kinase protein family in Trypanosoma  
1482 cruzi: Novel role of an AUK-B homologue in kinetoplast replication. *PLoS Negl*  
1483 *Trop Dis.* 13:e0007256.
- 1484 Gambarotto, D., V. Hamel, and P. Guichard. 2021. Ultrastructure expansion  
1485 microscopy (U-ExM). *Methods Cell Biol.* 161:57-81.
- 1486 Guttery, D.S., B. Poulin, D.J. Ferguson, B. Szoor, B. Wickstead, P.L. Carroll, C.  
1487 Ramakrishnan, D. Brady, E.M. Patzewitz, U. Straschil, L. Solyakov, J.L.  
1488 Green, R.E. Sinden, A.B. Tobin, A.A. Holder, and R. Tewari. 2012. A unique  
1489 protein phosphatase with kelch-like domains (PPKL) in Plasmodium  
1490 modulates ookinete differentiation, motility and invasion. *PLoS Pathog.*  
1491 8:e1002948.
- 1492 Guttery, D.S., B. Poulin, A. Ramaprasad, R.J. Wall, D.J. Ferguson, D. Brady, E.M.  
1493 Patzewitz, S. Whipple, U. Straschil, M.H. Wright, A.M. Mohamed, A.  
1494 Radhakrishnan, S.T. Arold, E.W. Tate, A.A. Holder, B. Wickstead, A. Pain,  
1495 and R. Tewari. 2014. Genome-wide functional analysis of Plasmodium protein  
1496 phosphatases reveals key regulators of parasite development and  
1497 differentiation. *Cell Host Microbe.* 16:128-140.

- 1498 Guttery, D.S., M. Zeeshan, D.J.P. Ferguson, A.A. Holder, and R. Tewari. 2022.  
1499 Division and Transmission: Malaria Parasite Development in the Mosquito.  
1500 *Annu Rev Microbiol.* 76:113-134.
- 1501 Hadders, M.A., and S.M.A. Lens. 2022. Changing places: Chromosomal Passenger  
1502 Complex relocation in early anaphase. *Trends Cell Biol.* 32:165-176.
- 1503 Hindriksen, S., S.M.A. Lens, and M.A. Hadders. 2017. The Ins and Outs of Aurora B  
1504 Inner Centromere Localization. *Front Cell Dev Biol.* 5:112.
- 1505 Hochegger, H., N. Hegarat, and J.B. Pereira-Leal. 2013. Aurora at the pole and  
1506 equator: overlapping functions of Aurora kinases in the mitotic spindle. *Open*  
1507 *Biol.* 3:120185.
- 1508 Invergo, B.M., M. Brochet, L. Yu, J. Choudhary, P. Beltrao, and O. Billker. 2017.  
1509 Sub-minute Phosphoregulation of Cell Cycle Systems during Plasmodium  
1510 Gamete Formation. *Cell Rep.* 21:2017-2029.
- 1511 Iwanaga, S., T. Kato, I. Kaneko, and M. Yuda. 2012. Centromere plasmid: a new  
1512 genetic tool for the study of Plasmodium falciparum. *PLoS One.* 7:e33326.
- 1513 Janse, C.J., J. Ramesar, and A.P. Waters. 2006. High-efficiency transfection and  
1514 drug selection of genetically transformed blood stages of the rodent malaria  
1515 parasite Plasmodium berghei. *Nat Protoc.* 1:346-356.
- 1516 Kawabe, A., S. Matsunaga, K. Nakagawa, D. Kurihara, A. Yoneda, S. Hasezawa, S.  
1517 Uchiyama, and K. Fukui. 2005. Characterization of plant Aurora kinases  
1518 during mitosis. *Plant Mol Biol.* 58:1-13.
- 1519 Komaki, S., E.C. Tromer, G. De Jaeger, N. De Winne, M. Heese, and A. Schnittger.  
1520 2022. Molecular convergence by differential domain acquisition is a hallmark  
1521 of chromosomal passenger complex evolution. *Proc Natl Acad Sci U S A.*  
1522 119:e2200108119.
- 1523 Komarova, Y., C.O. De Groot, I. Grigoriev, S.M. Gouveia, E.L. Munteanu, J.M.  
1524 Schober, S. Honnappa, R.M. Buey, C.C. Hoogenraad, M. Dogterom, G.G.  
1525 Borisy, M.O. Steinmetz, and A. Akhmanova. 2009. Mammalian end binding  
1526 proteins control persistent microtubule growth. *J Cell Biol.* 184:691-706.
- 1527 Kops, G., B. Snel, and E.C. Tromer. 2020. Evolutionary Dynamics of the Spindle  
1528 Assembly Checkpoint in Eukaryotes. *Curr Biol.* 30:R589-R602.
- 1529 Li, J., G.J. Shami, E. Cho, B. Liu, E. Hanssen, M.W.A. Dixon, and L. Tilley. 2022.  
1530 Repurposing the mitotic machinery to drive cellular elongation and chromatin  
1531 reorganisation in Plasmodium falciparum gametocytes. *Nat Commun.*  
1532 13:5054.
- 1533 Liu, Y., R. Tewari, J. Ning, A.M. Blagborough, S. Garbom, J. Pei, N.V. Grishin, R.E.  
1534 Steele, R.E. Sinden, W.J. Snell, and O. Billker. 2008. The conserved plant  
1535 sterility gene HAP2 functions after attachment of fusogenic membranes in  
1536 Chlamydomonas and Plasmodium gametes. *Genes Dev.* 22:1051-1068.
- 1537 Mair, G.R., J.A. Braks, L.S. Garver, J.C. Wiegant, N. Hall, R.W. Dirks, S.M. Khan, G.  
1538 Dimopoulos, C.J. Janse, and A.P. Waters. 2006. Regulation of sexual  
1539 development of Plasmodium by translational repression. *Science.* 313:667-  
1540 669.
- 1541 Metsalu, T., and J. Vilo. 2015. ClustVis: a web tool for visualizing clustering of  
1542 multivariate data using Principal Component Analysis and heatmap. *Nucleic*  
1543 *Acids Res.* 43:W566-570.
- 1544 Pfander, C., B. Anar, M. Brochet, J.C. Rayner, and O. Billker. 2013. Recombination-  
1545 mediated genetic engineering of Plasmodium berghei DNA. *Methods Mol Biol.*  
1546 923:127-138.

- 1547 Pfander, C., B. Anar, F. Schwach, T.D. Otto, M. Brochet, K. Volkmann, M.A. Quail,  
1548 A. Pain, B. Rosen, W. Skarnes, J.C. Rayner, and O. Billker. 2011. A scalable  
1549 pipeline for highly effective genetic modification of a malaria parasite. *Nat*  
1550 *Methods*. 8:1078-1082.
- 1551 Philip, N., and A.P. Waters. 2015. Conditional Degradation of Plasmodium  
1552 Calcineurin Reveals Functions in Parasite Colonization of both Host and  
1553 Vector. *Cell Host Microbe*. 18:122-131.
- 1554 Ponjavic, I., K. Vukusic, and I.M. Tolic. 2021. Expansion microscopy of the mitotic  
1555 spindle. *Methods Cell Biol*. 161:247-274.
- 1556 Rashpa, R., and M. Brochet. 2022. Expansion microscopy of Plasmodium  
1557 gametocytes reveals the molecular architecture of a bipartite microtubule  
1558 organisation centre coordinating mitosis with axoneme assembly. *PLoS*  
1559 *Pathog*. 18:e1010223.
- 1560 Reininger, L., J.M. Wilkes, H. Bourgade, D. Miranda-Saavedra, and C. Doerig. 2011.  
1561 An essential Aurora-related kinase transiently associates with spindle pole  
1562 bodies during Plasmodium falciparum erythrocytic schizogony. *Mol Microbiol*.  
1563 79:205-221.
- 1564 Roques, M., R.J. Wall, A.P. Douglass, A. Ramaprasad, D.J. Ferguson, M.L.  
1565 Kaindama, L. Brusini, N. Joshi, Z. Rchiad, D. Brady, D.S. Guttery, S.P.  
1566 Wheatley, H. Yamano, A.A. Holder, A. Pain, B. Wickstead, and R. Tewari.  
1567 2015. Plasmodium P-Type Cyclin CYC3 Modulates Endomitotic Growth  
1568 during Oocyst Development in Mosquitoes. *PLoS Pathog*. 11:e1005273.
- 1569 Sebastian, S., M. Brochet, M.O. Collins, F. Schwach, M.L. Jones, D. Goulding, J.C.  
1570 Rayner, J.S. Choudhary, and O. Billker. 2012. A Plasmodium calcium-  
1571 dependent protein kinase controls zygote development and transmission by  
1572 translationally activating repressed mRNAs. *Cell Host Microbe*. 12:9-19.
- 1573 Siman-Tov, M.M., A.C. Ivens, and C.L. Jaffe. 2001. Identification and cloning of  
1574 Lmairk, a member of the Aurora/Ipl1p protein kinase family, from the human  
1575 protozoan parasite Leishmania. *Biochim Biophys Acta*. 1519:241-245.
- 1576 Simon, C.S., C. Funaya, J. Bauer, Y. Vobeta, M. Machado, A. Penning, D. Klaschka,  
1577 M. Cyrklaff, J. Kim, M. Ganter, and J. Guizetti. 2021. An extended DNA-free  
1578 intranuclear compartment organizes centrosome microtubules in malaria  
1579 parasites. *Life Sci Alliance*. 4.
- 1580 Solyakov, L., J. Halbert, M.M. Alam, J.P. Semblat, D. Dorin-Semblat, L. Reininger,  
1581 A.R. Bottrill, S. Mistry, A. Abdi, C. Fennell, Z. Holland, C. Demarta, Y. Bouza,  
1582 A. Sicard, M.P. Nivez, S. Eschenlauer, T. Lama, D.C. Thomas, P. Sharma, S.  
1583 Agarwal, S. Kern, G. Pradel, M. Graciotti, A.B. Tobin, and C. Doerig. 2011.  
1584 Global kinomic and phospho-proteomic analyses of the human malaria  
1585 parasite Plasmodium falciparum. *Nat Commun*. 2:565.
- 1586 Sun, L., J. Gao, X. Dong, M. Liu, D. Li, X. Shi, J.T. Dong, X. Lu, C. Liu, and J. Zhou.  
1587 2008. EB1 promotes Aurora-B kinase activity through blocking its inactivation  
1588 by protein phosphatase 2A. *Proc Natl Acad Sci U S A*. 105:7153-7158.
- 1589 Tang, A., K. Gao, L. Chu, R. Zhang, J. Yang, and J. Zheng. 2017. Aurora kinases:  
1590 novel therapy targets in cancers. *Oncotarget*. 8:23937-23954.
- 1591 Tewari, R., U. Straschil, A. Bateman, U. Bohme, I. Cherevach, P. Gong, A. Pain, and  
1592 O. Billker. 2010. The systematic functional analysis of Plasmodium protein  
1593 kinases identifies essential regulators of mosquito transmission. *Cell Host*  
1594 *Microbe*. 8:377-387.

1595 van Hooff, J.J., E. Tromer, L.M. van Wijk, B. Snel, and G.J. Kops. 2017. Evolutionary  
1596 dynamics of the kinetochore network in eukaryotes as revealed by  
1597 comparative genomics. *EMBO Rep.* 18:1559-1571.

1598 Volkmann, K., C. Pfander, C. Burstroem, M. Ahras, D. Goulding, J.C. Rayner, F.  
1599 Frischknecht, O. Billker, and M. Brochet. 2012. The alveolin IMC1h is required  
1600 for normal ookinete and sporozoite motility behaviour and host colonisation in  
1601 *Plasmodium berghei*. *PLoS One.* 7:e41409.

1602 Willems, E., M. Dedobbeleer, M. Digregorio, A. Lombard, P.N. Lumapat, and B.  
1603 Rogister. 2018. The functional diversity of Aurora kinases: a comprehensive  
1604 review. *Cell Div.* 13:7.

1605 Zeeshan, M., D. Brady, R. Markus, S. Vaughan, D. Ferguson, A.A. Holder, and R.  
1606 Tewari. 2022. Plasmodium SAS4: basal body component of male cell which is  
1607 dispensable for parasite transmission. *Life Sci Alliance.* 5.

1608 Zeeshan, M., D. Brady, R.R. Stanway, C.A. Moores, A.A. Holder, and R. Tewari.  
1609 2020a. Plasmodium berghei Kinesin-5 Associates With the Spindle Apparatus  
1610 During Cell Division and Is Important for Efficient Production of Infectious  
1611 Sporozoites. *Front Cell Infect Microbiol.* 10:583812.

1612 Zeeshan, M., D.J. Ferguson, S. Abel, A. Burrell, E. Rea, D. Brady, E. Daniel, M.  
1613 Delves, S. Vaughan, A.A. Holder, K.G. Le Roch, C.A. Moores, and R. Tewari.  
1614 2019a. Kinesin-8B controls basal body function and flagellum formation and is  
1615 key to malaria transmission. *Life Sci Alliance.* 2.

1616 Zeeshan, M., R. Pandey, D.J.P. Ferguson, E.C. Tromer, R. Markus, S. Abel, D.  
1617 Brady, E. Daniel, R. Limenitakis, A.R. Bottrill, K.G. Le Roch, A.A. Holder, R.F.  
1618 Waller, D.S. Guttery, and R. Tewari. 2020b. Real-time dynamics of  
1619 Plasmodium NDC80 reveals unusual modes of chromosome segregation  
1620 during parasite proliferation. *J Cell Sci.* 134.

1621 Zeeshan, M., F. Shilliday, T. Liu, S. Abel, T. Mourier, D.J.P. Ferguson, E. Rea, R.R.  
1622 Stanway, M. Roques, D. Williams, E. Daniel, D. Brady, A.J. Roberts, A.A.  
1623 Holder, A. Pain, K.G. Le Roch, C.A. Moores, and R. Tewari. 2019b.  
1624 Plasmodium kinesin-8X associates with mitotic spindles and is essential for  
1625 oocyst development during parasite proliferation and transmission. *PLoS*  
1626 *Pathog.* 15:e1008048.

1627



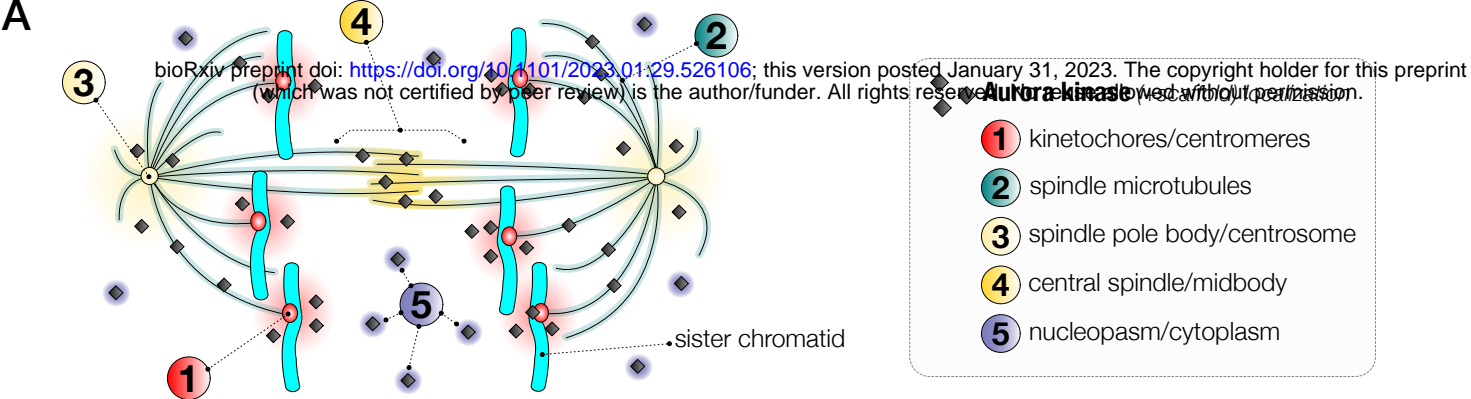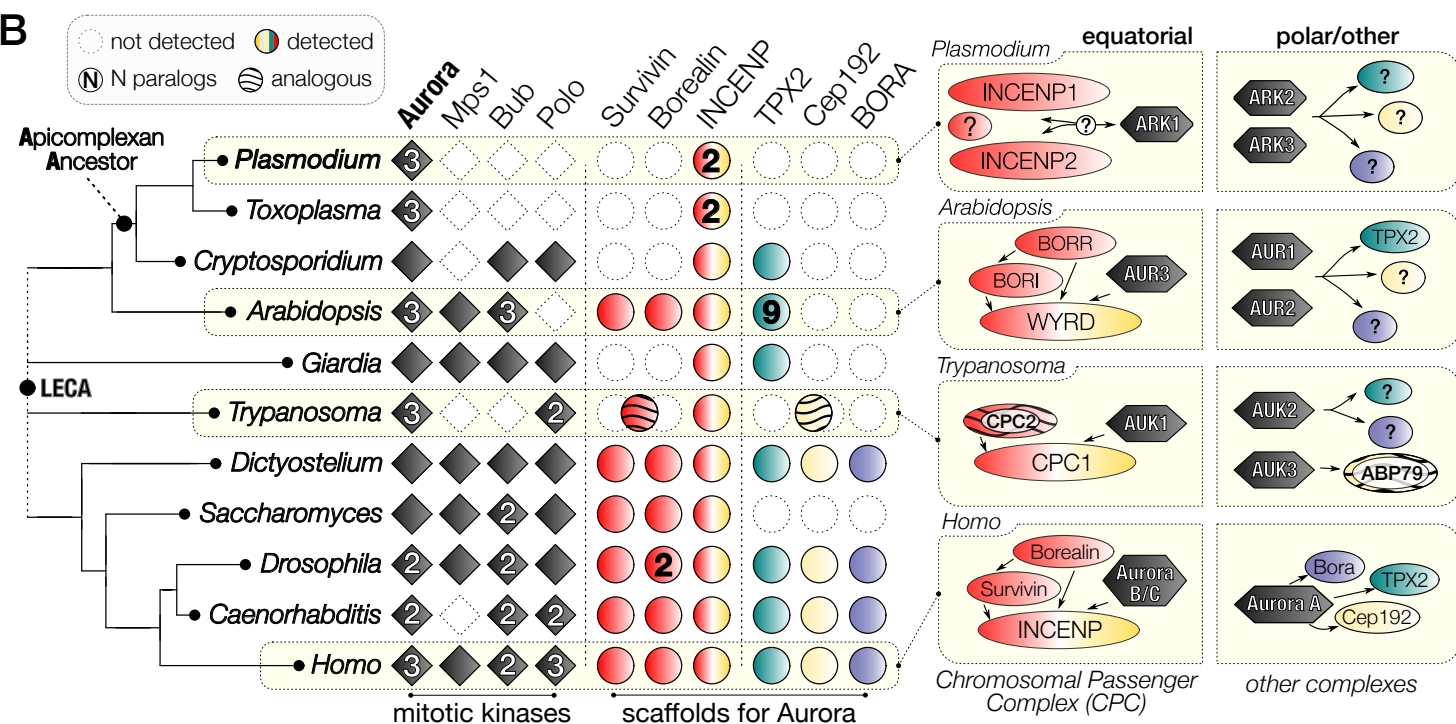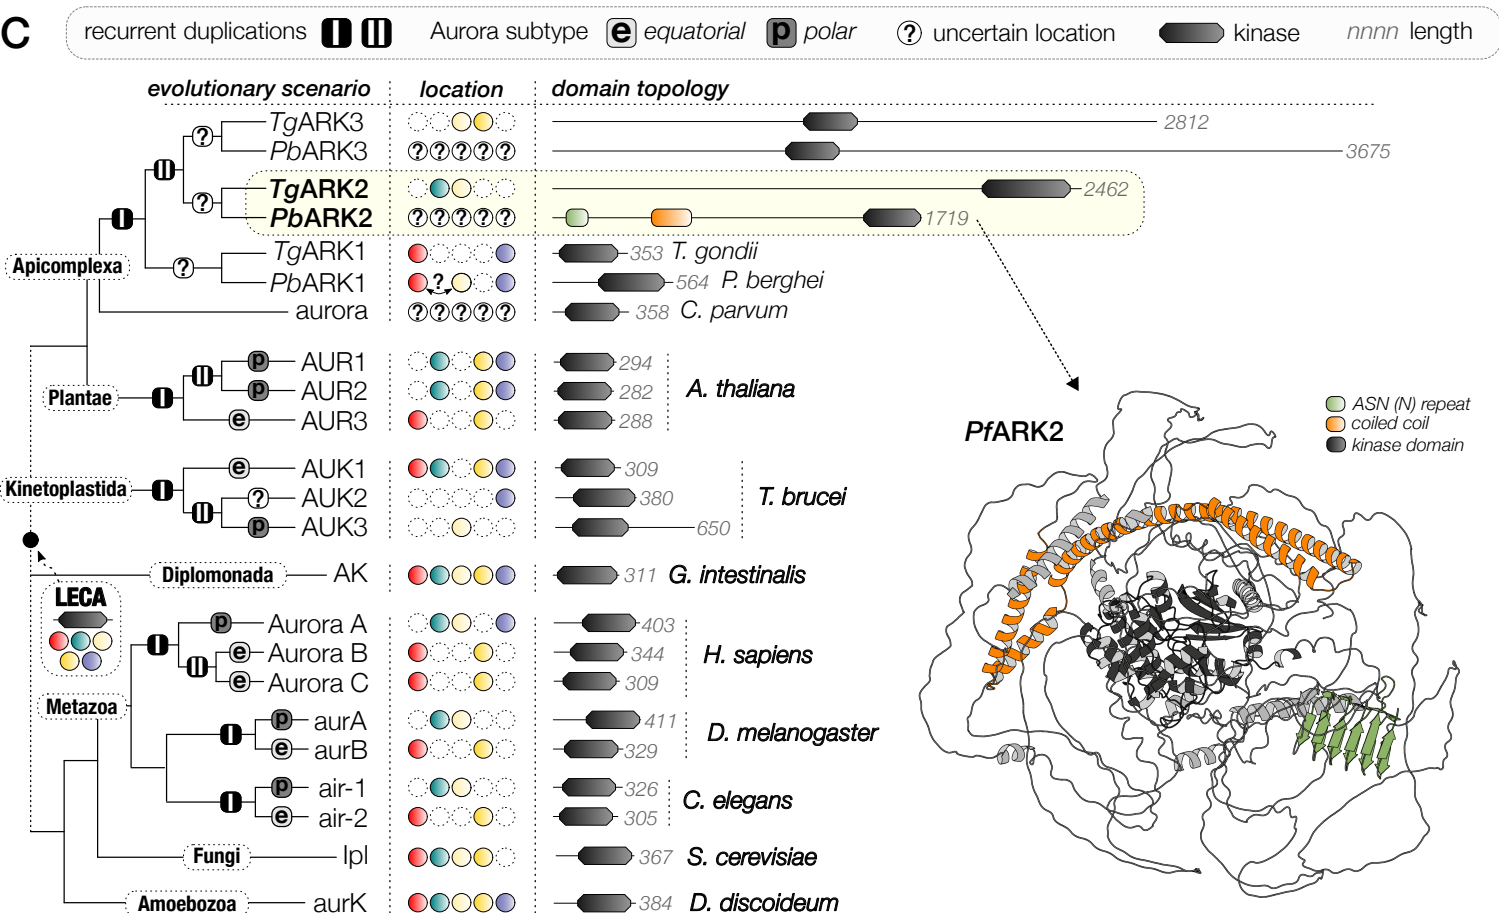

# Fig 2

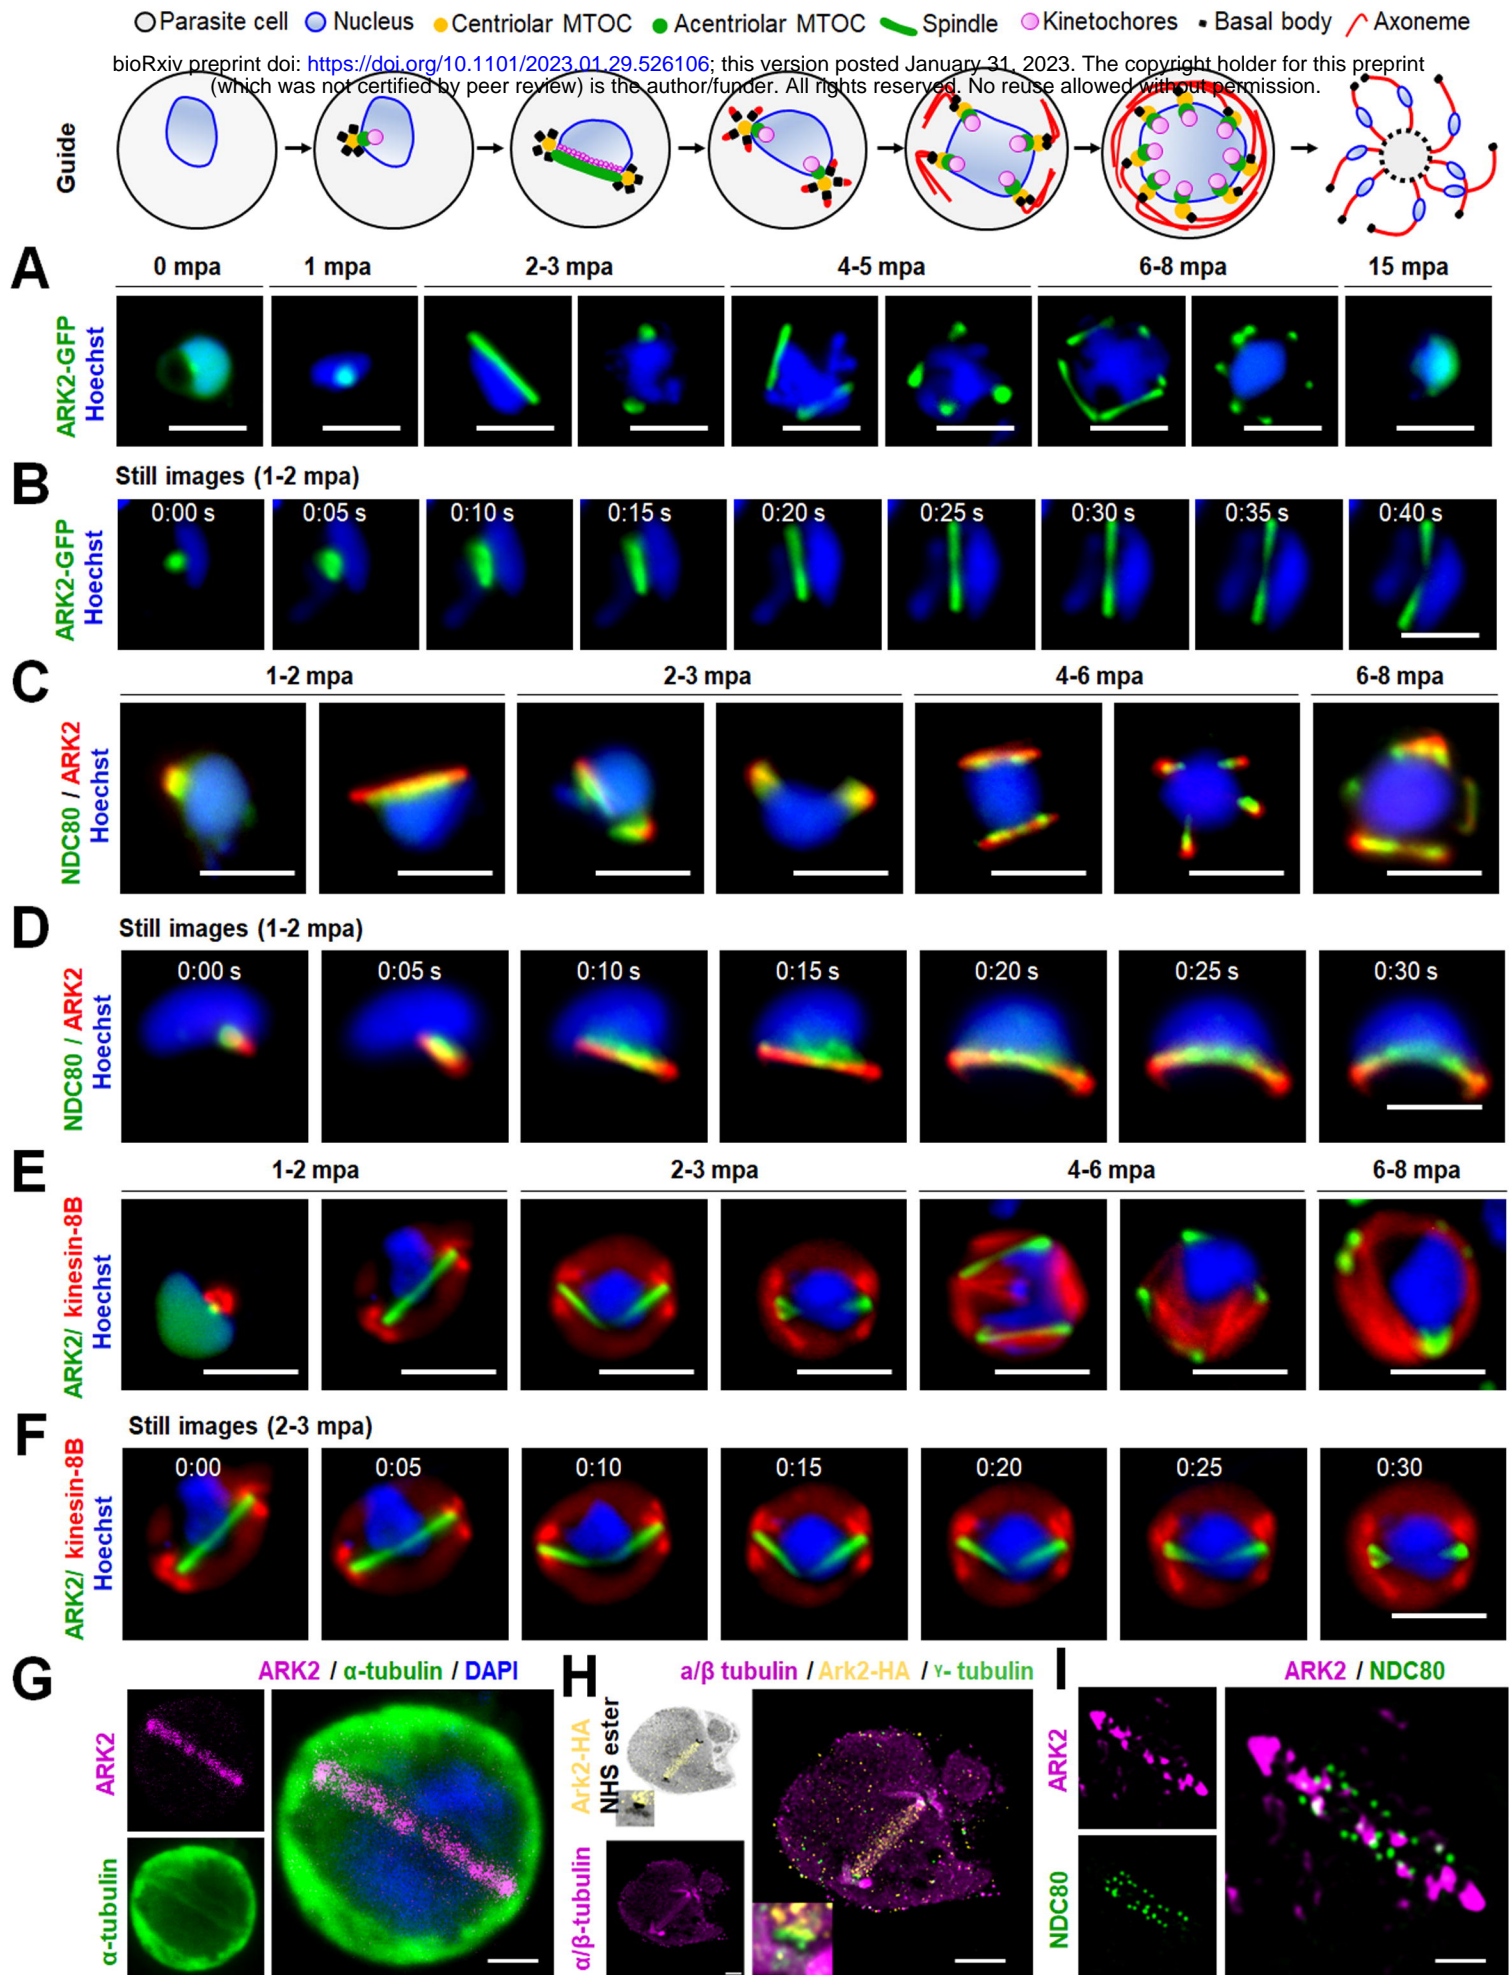

# Fig 3

**A**

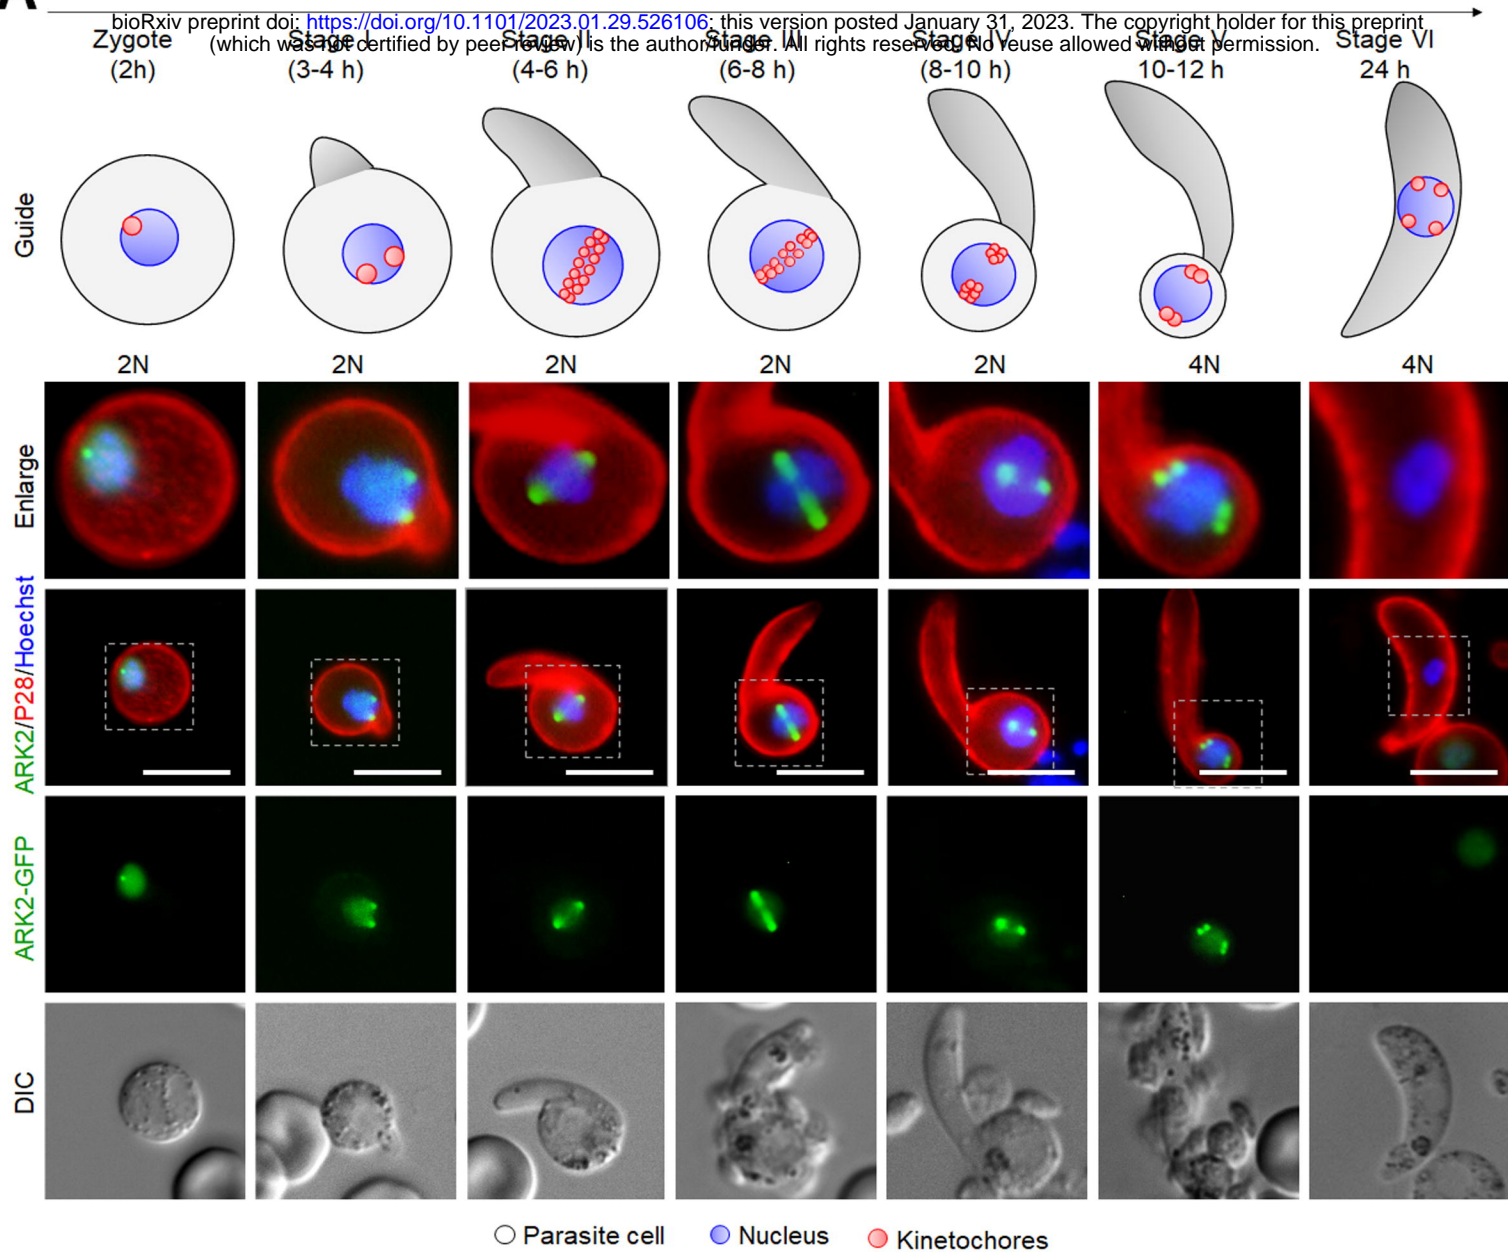

**B**

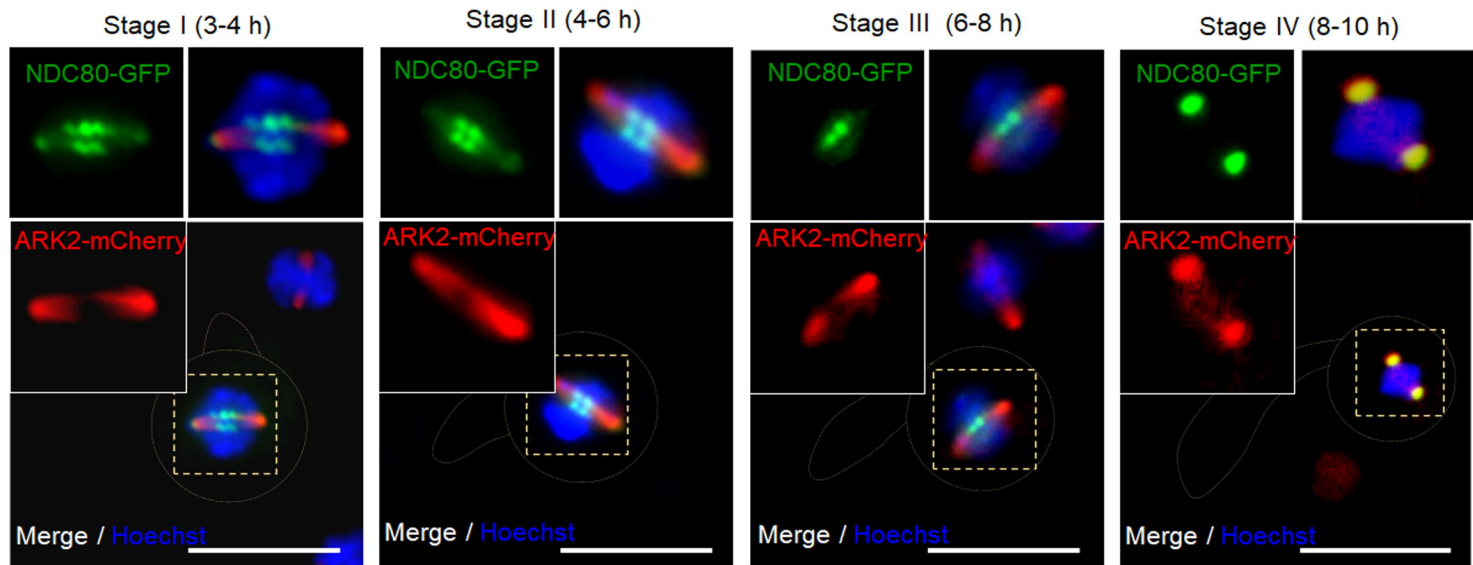

# Fig 4

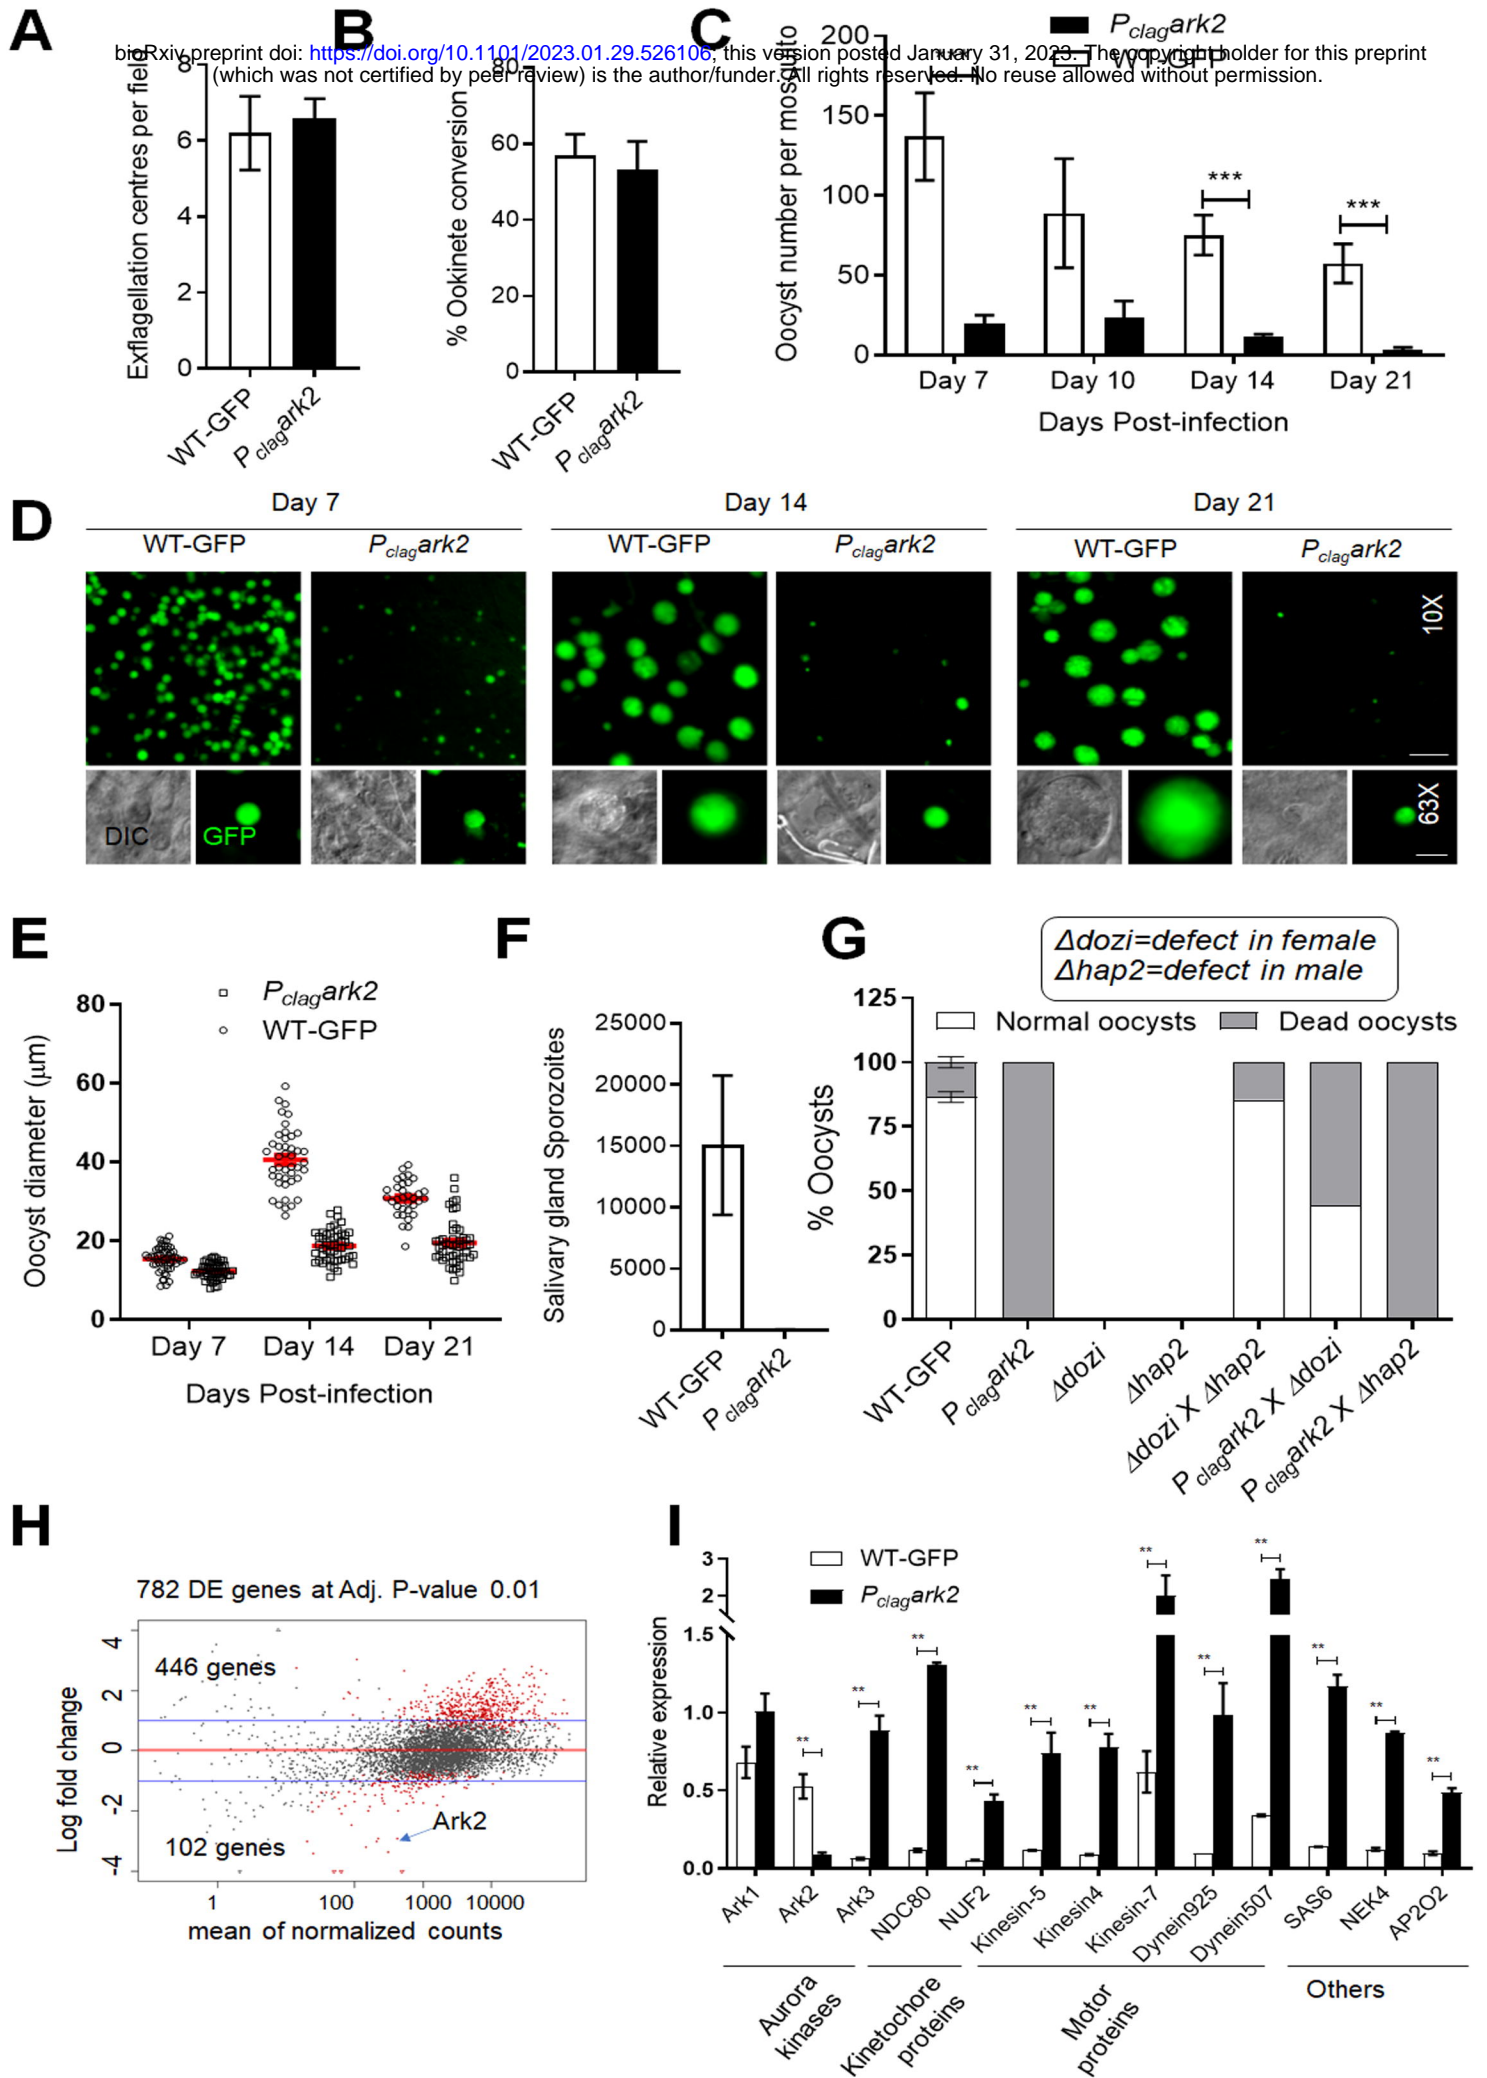

**A**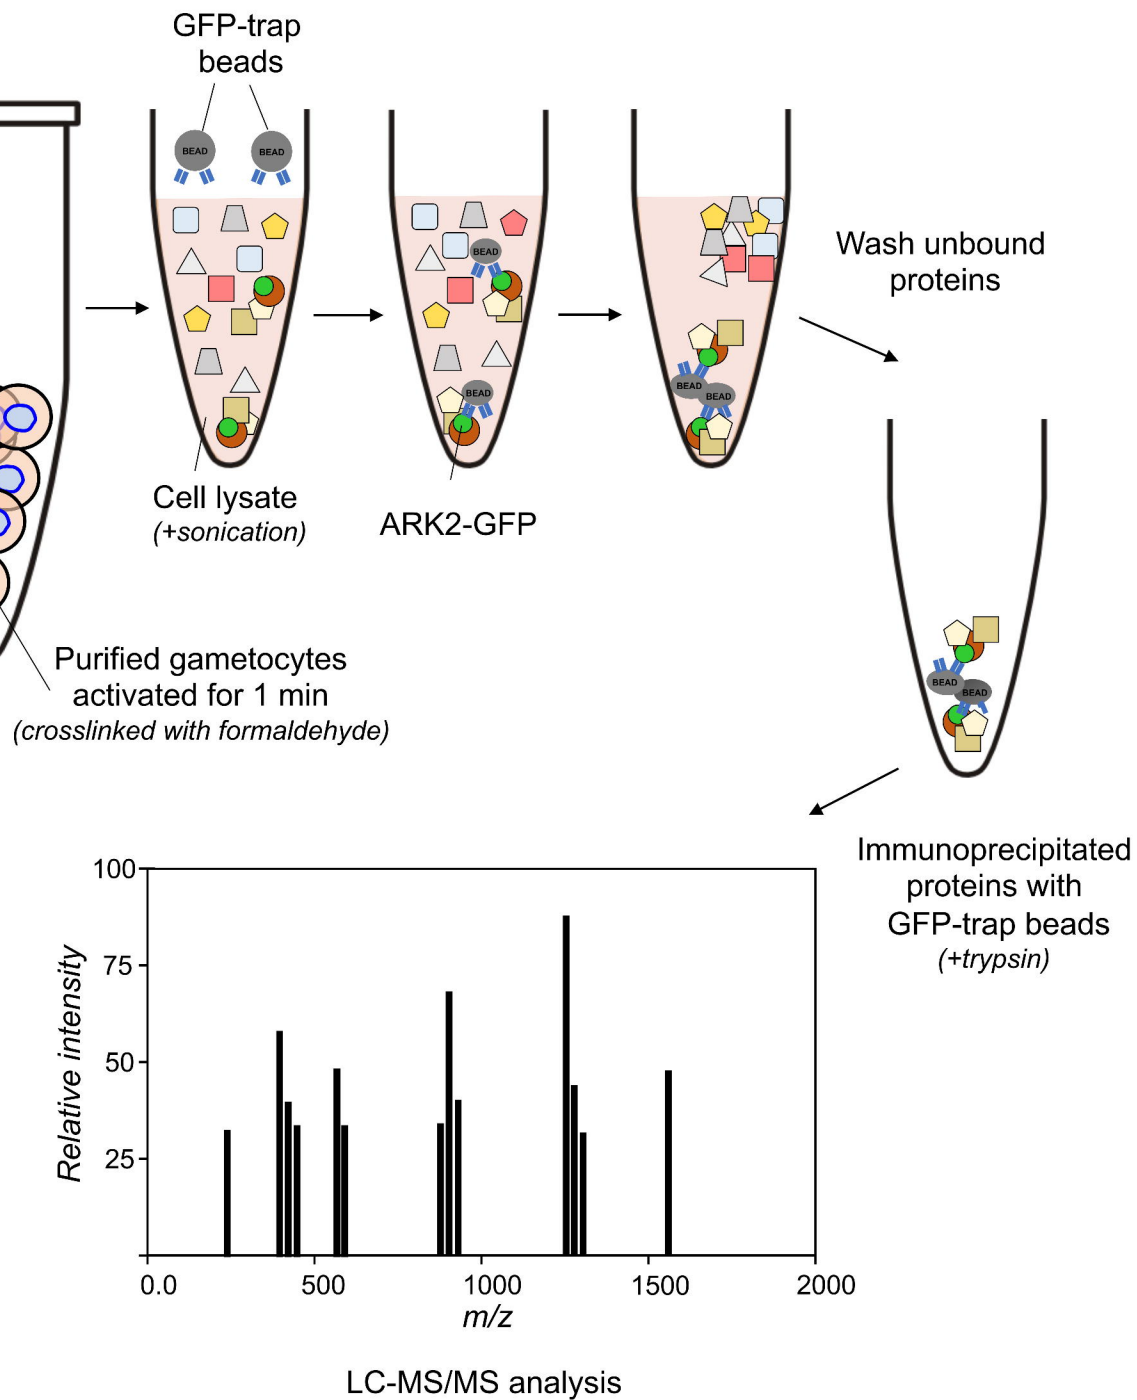**B****GFP vs ARK2-GFP**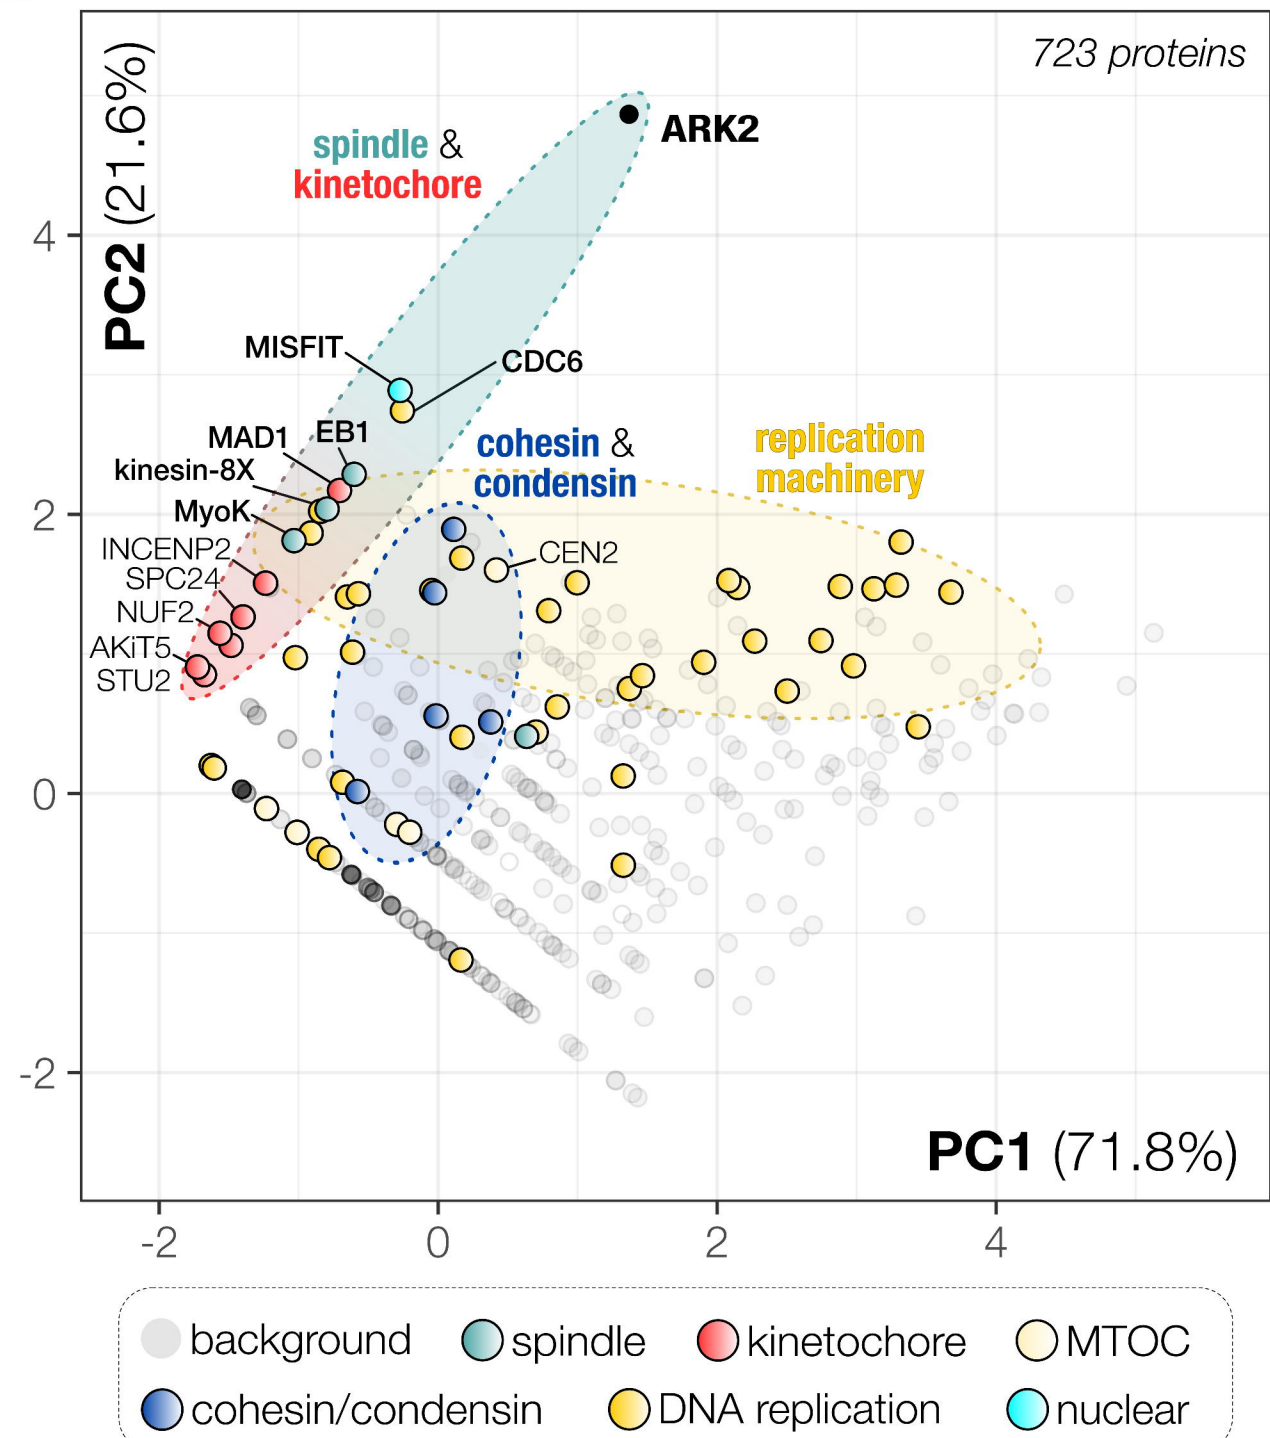

# Fig 6

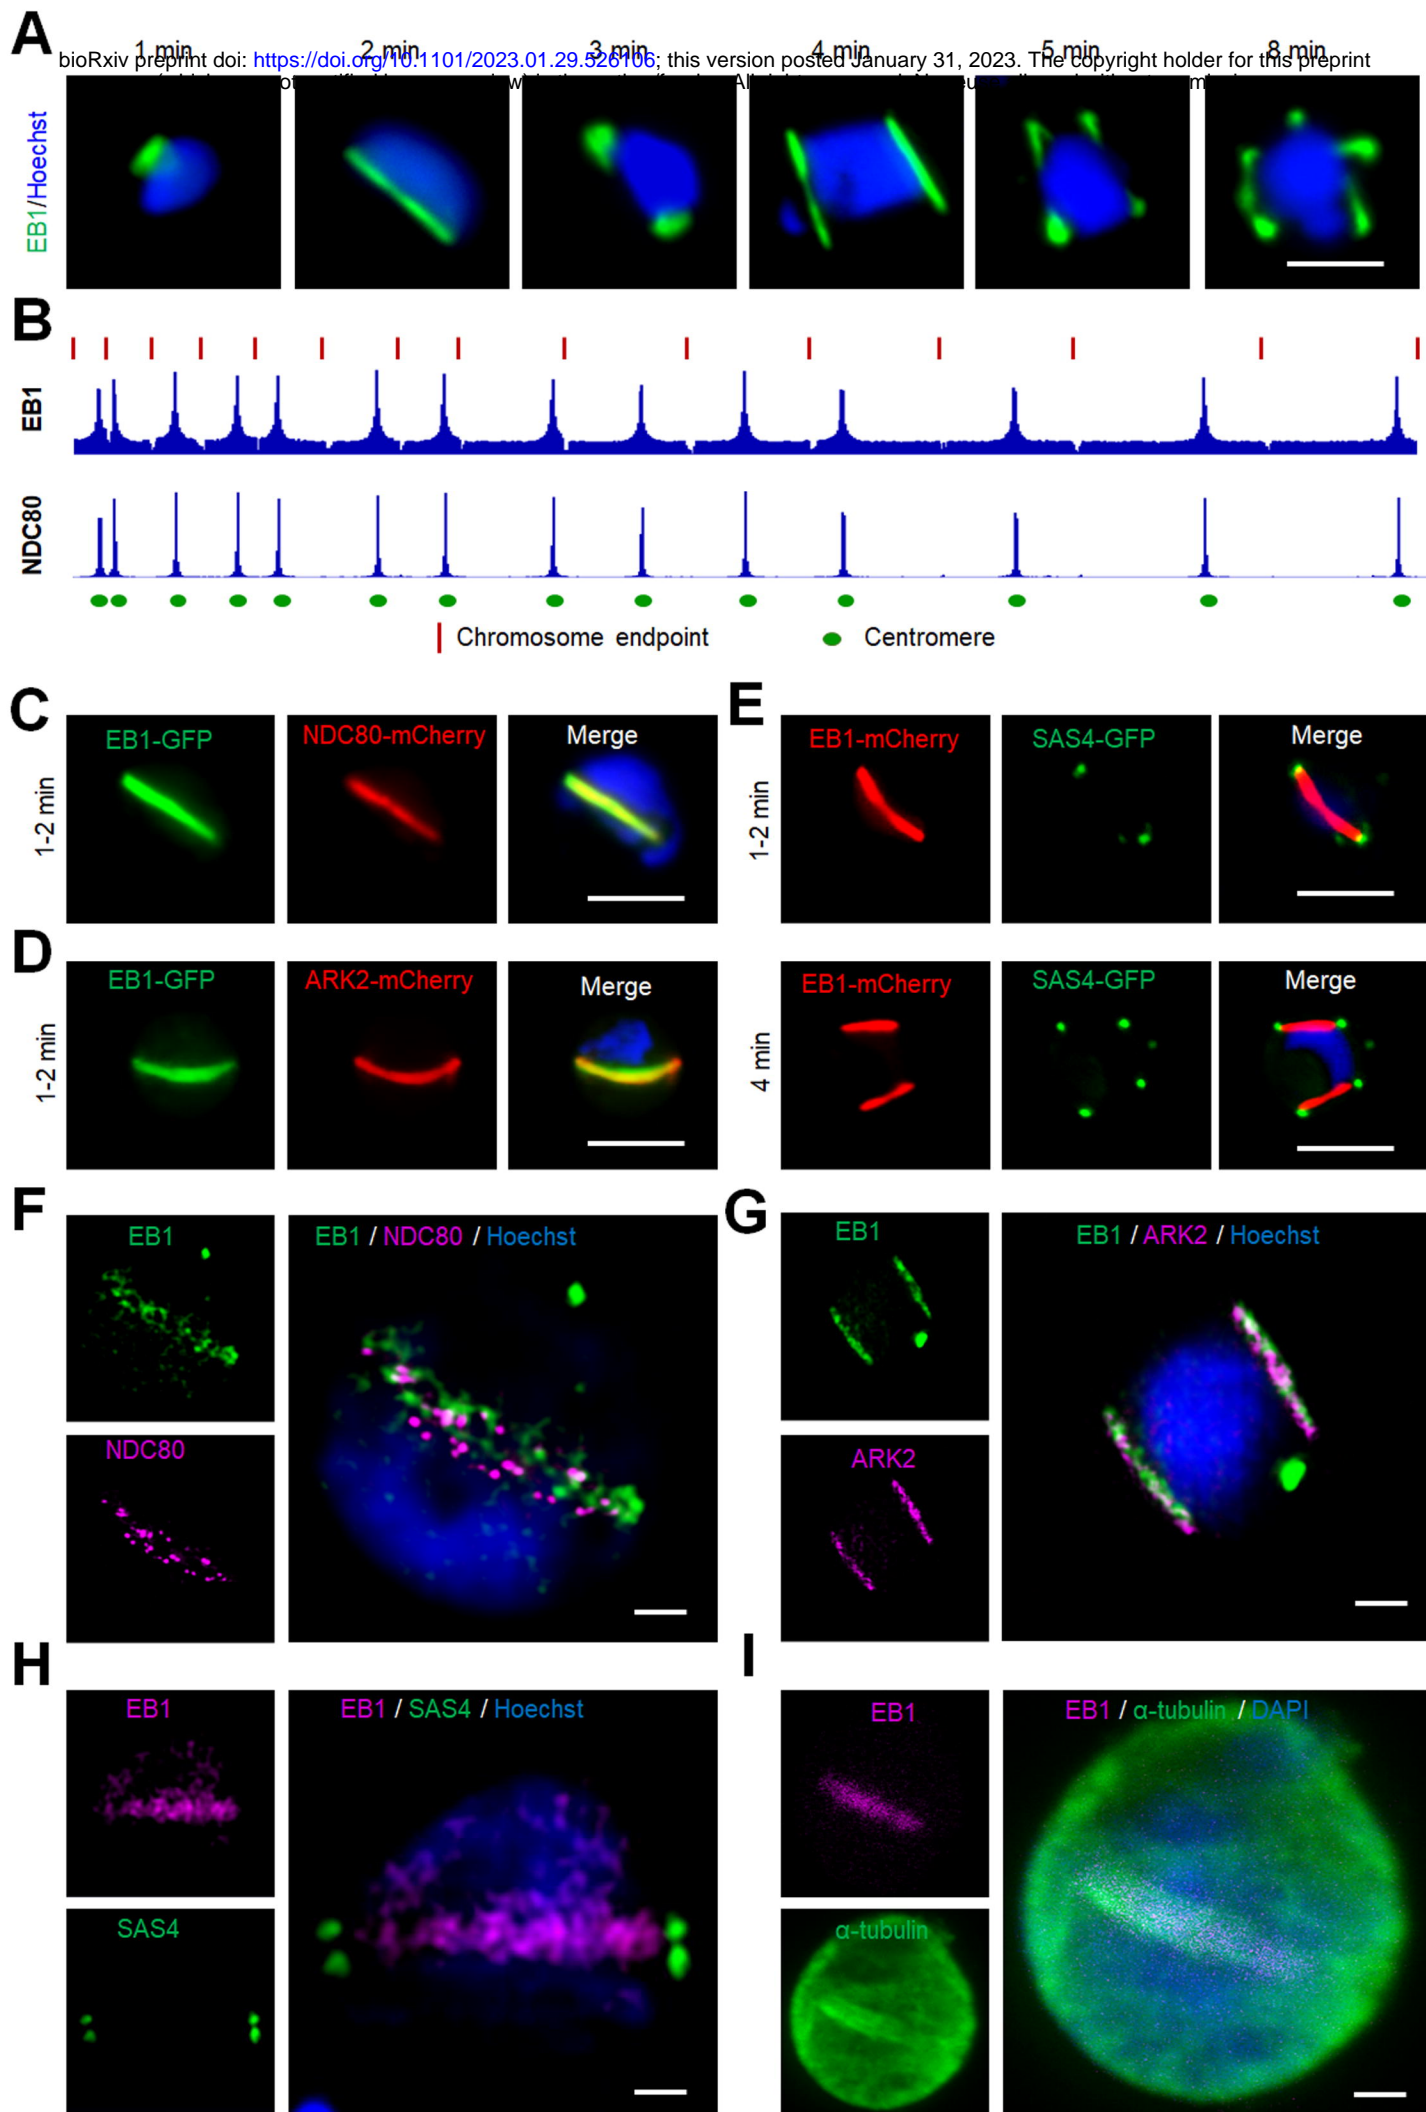

# Fig 7

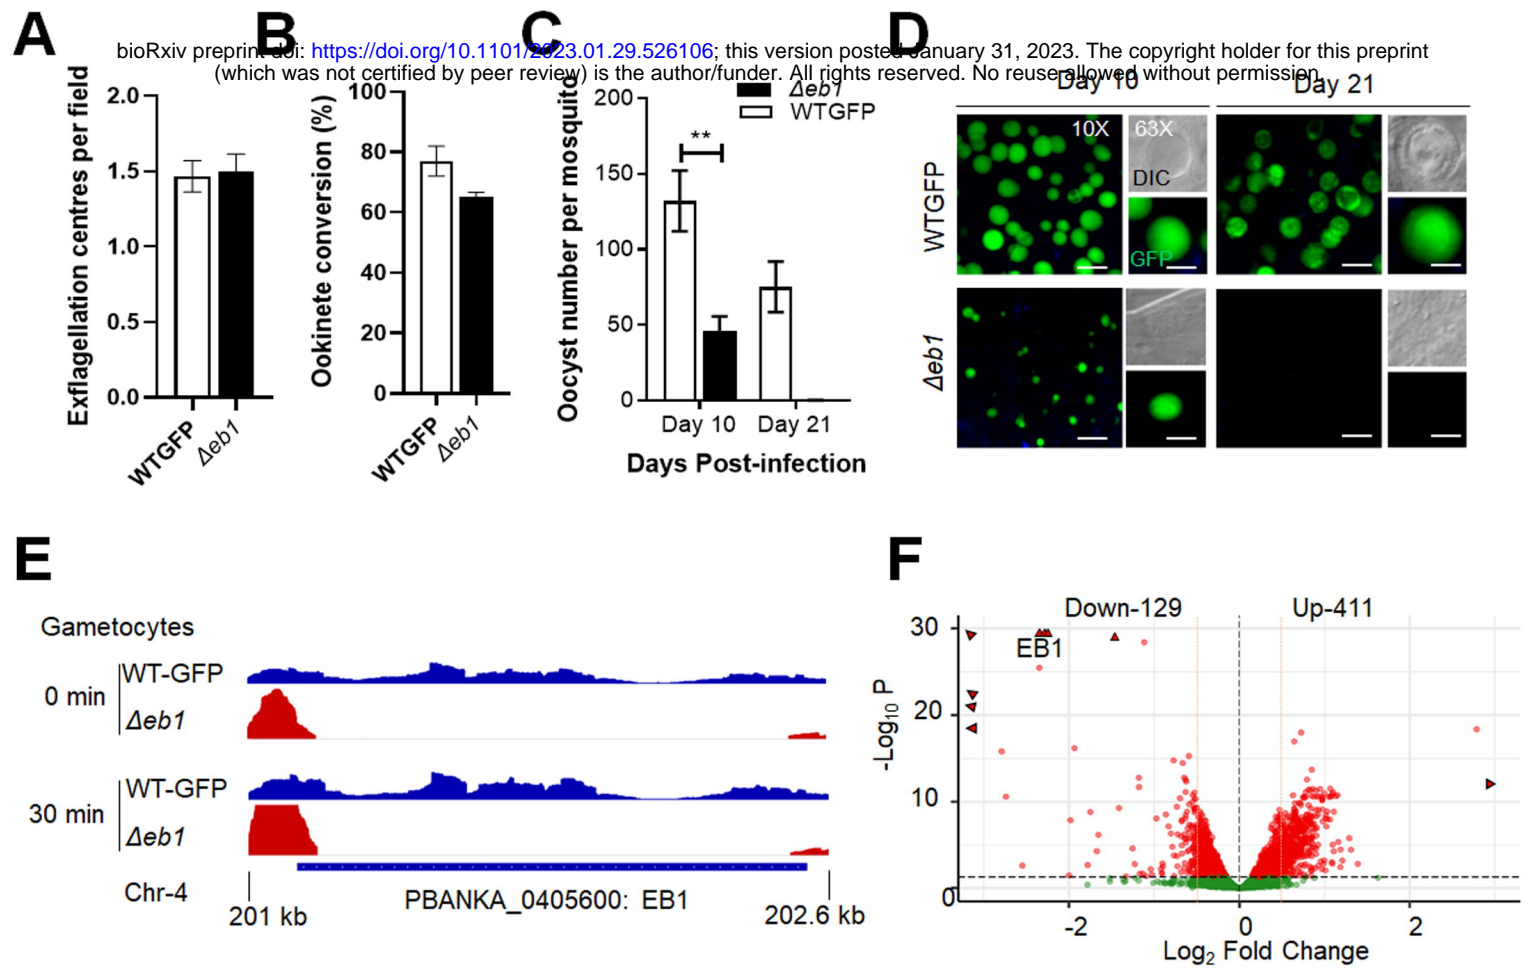

**A** GFP vs EB1-GFP

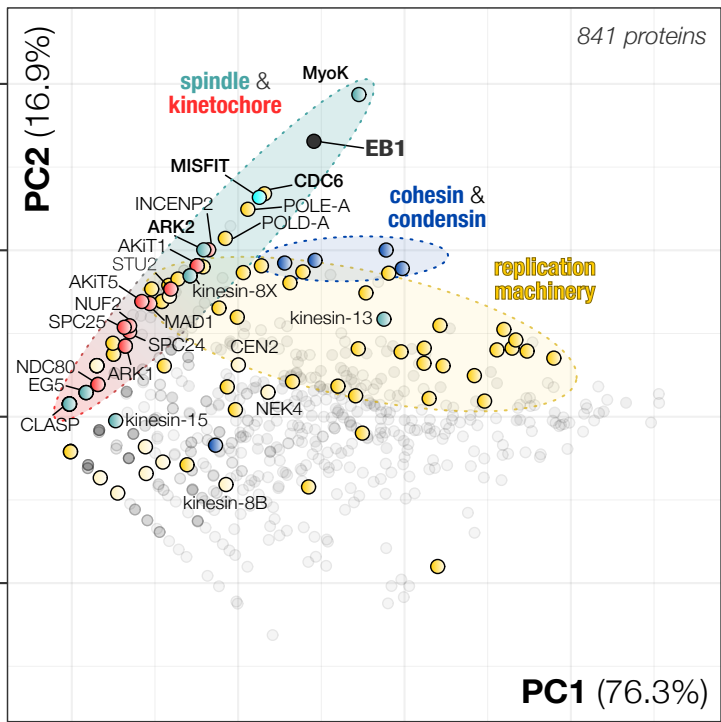

**B** GFP vs ARK2-GFP vs EB1-GFP

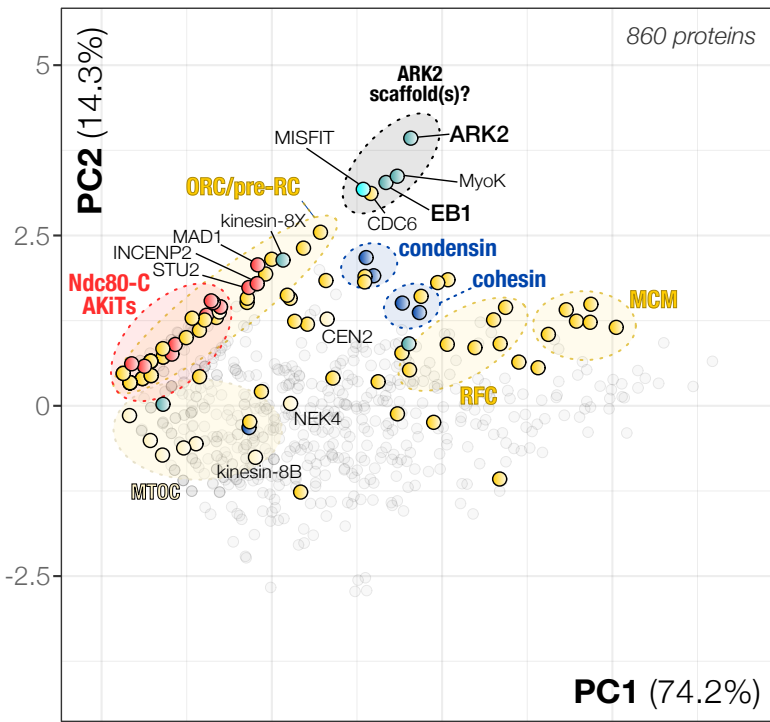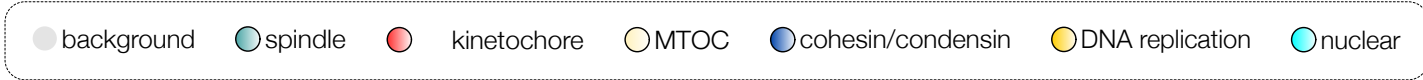

**C**

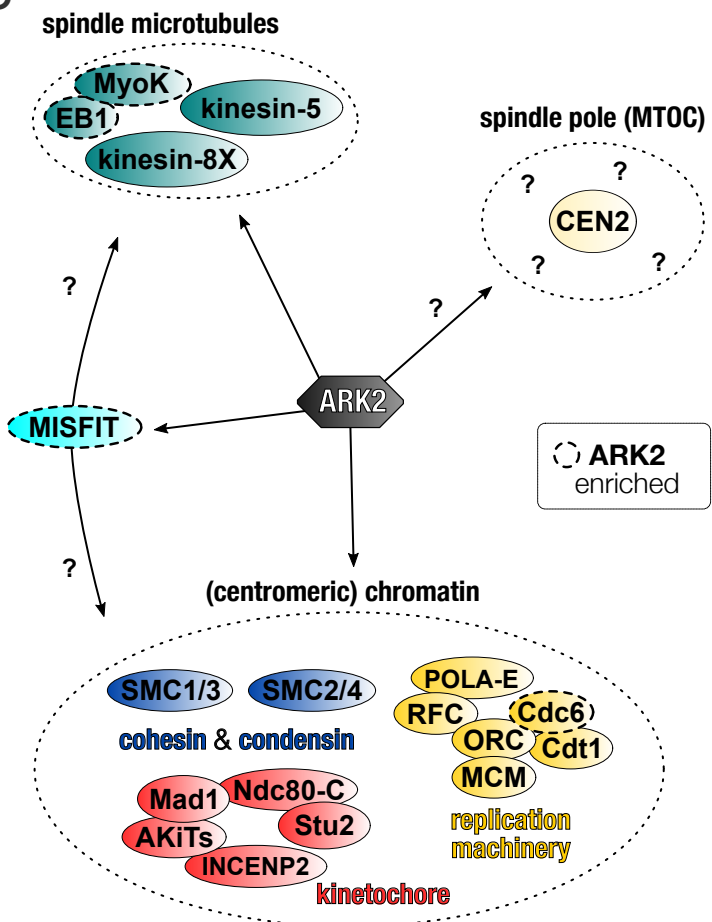

**D**

location of mitotic proteins during male gametogony

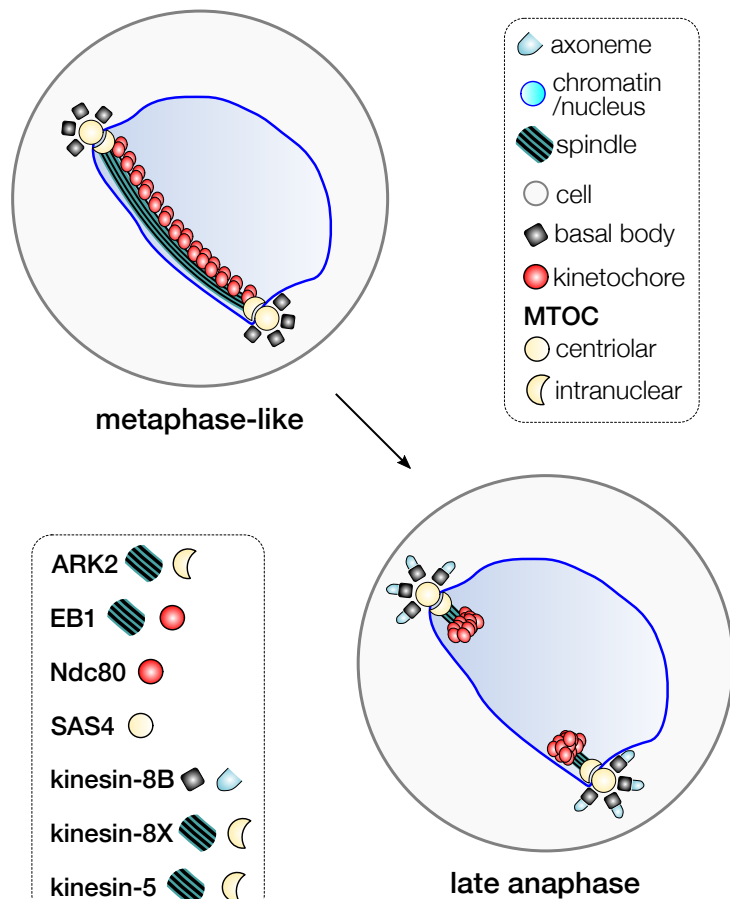

Source: https://www.biorxiv.org/content/10.1101/2023.01.29.526106v1.full.pdf
